1 **Title:**

2 **RD5-mediated lack of PE\_PGRS and PPE-MPTR export in BCG vaccine strains results**  
3 **in strong reduction of antigenic repertoire but little impact on protection**

4

5 **Short Title:**

6 **BCG vaccine is deficient in PE\_PGRS/PPE-MPTR secretion**

7

8 **Authors:**

9 Louis S. Ates <sup>1,2,\*</sup>, Fadel Sayes <sup>1</sup>, Wafa Frigui <sup>1</sup>, Roy Ummels <sup>3</sup>, Merel P. M. Damen <sup>1,3</sup>, Daria  
10 Bottai <sup>4</sup>, Marcel A. Behr <sup>5</sup>, Wilbert Bitter <sup>3,6</sup>, Laleh Majlessi <sup>1</sup>, Roland Brosch <sup>1,\*</sup>

11

12 <sup>1</sup> Unit for Integrated Mycobacterial Pathogenomics, Institut Pasteur, Paris 75015, France

13 <sup>2</sup> Department of Experimental immunology, Amsterdam Medical Centre (AMC), Amsterdam,  
14 the Netherlands.

15 <sup>3</sup> Department of Medical Microbiology and Infection Prevention, VU University Medical  
16 Center, Amsterdam, the Netherlands.

17 <sup>4</sup> University of Pisa, Department of Biology, Pisa, Italy.

18 <sup>5</sup> McGill International TB Centre and Department of Medicine, McGill University, Montreal,  
19 Canada.

20 <sup>6</sup> Section Molecular Microbiology, Amsterdam Institute of Molecules, Medicine & Systems,  
21 Vrije Universiteit, Amsterdam, the Netherlands.

22

23

24

25

26

27 \* Corresponding authors: Louis S. Ates, L.S.Ates@AMC.nl and Roland Brosch,

28 Roland.Brosch@pasteur.fr

29 **Abstract**

30 Tuberculosis is the deadliest infectious disease worldwide. Although the BCG vaccine is  
31 widely used, it does not efficiently protect against pulmonary tuberculosis and an improved  
32 tuberculosis vaccine is therefore urgently needed. *Mycobacterium tuberculosis* uses different  
33 ESX/Type VII secretion (T7S) systems to transport proteins important for virulence and host  
34 immune responses. We recently reported that secretion of T7S substrates belonging to the  
35 mycobacteria-specific Pro-Glu (PE) and Pro-Pro-Glu (PPE) proteins of the PGRS  
36 (polymorphic GC-rich sequences) and MPTR (major polymorphic tandem repeat) subfamilies  
37 required both a functional ESX-5 system and a functional PPE38/71 protein for secretion.  
38 Inactivation of *ppe38/71* and the resulting loss of PE\_PGRS/PPE-MPTR secretion were  
39 linked to increased virulence of *M. tuberculosis* strains. Here, we show that a predicted total  
40 of 89 PE\_PGRS/PPE-MPTR surface proteins are not exported by certain animal-adapted  
41 strains of the *M. tuberculosis* complex including *M. bovis*. This  $\Delta ppe38/71$ -associated  
42 secretion defect therefore also occurs in the *M. bovis*-derived tuberculosis vaccine BCG and  
43 could be restored by introduction of the *M. tuberculosis ppe38*-locus. Epitope mapping of the  
44 PPE-MPTR protein PPE10, further allowed us to monitor T-cell responses in splenocytes  
45 from BCG/*M. tuberculosis* immunized mice, confirming the dependence of PPE10-specific  
46 immune-induction on ESX-5/PPE38-mediated secretion. Restoration of PE\_PGRS/PPE-  
47 MPTR secretion in recombinant BCG neither altered global antigenic presentation or  
48 activation of innate immune cells, nor protective efficacy in two different mouse vaccination-  
49 infection models. This unexpected finding stimulates a reassessment of the  
50 immunomodulatory properties of PE\_PGRS/PPE-MPTR proteins, some of which are  
51 contained in vaccine formulations currently in clinical evaluation.

52

53 **Keywords:** Tuberculosis, Mycobacterium, Vaccine, BCG, PE\_PGRS, PPE-MPTR, PPE38,  
54 T-cell

## 55 **Introduction**

56 Tuberculosis is the deadliest infectious disease worldwide and is responsible for more  
57 than 1.7 million deaths per year [1]. Its causative agent, *Mycobacterium tuberculosis*, is a  
58 slow growing bacterium inherently resistant to many antibiotics. This problem is further  
59 exacerbated by rising levels of acquired drug resistance, resulting in multi-drug-resistant  
60 (MDR) and extensively-drug-resistant (XDR) strains of *M. tuberculosis*, which require  
61 treatment regimens of two years with low treatment success rates and severe side effects [1–  
62 3]. These worrying developments highlight the need for a successful vaccine, halting the  
63 transmission of tuberculosis [4]. The currently used vaccine is based on of *Mycobacterium*  
64 *bovis*, attenuated through serial culture by Calmette and Guérin and therefore known as  
65 Bacille Calmette-Guérin (BCG) [5–7]. BCG is generally believed to protect relatively well  
66 against severe forms of disseminated tuberculosis in children, but is unable to induce full  
67 protection or halt transmission of *M. tuberculosis* in adolescents and adults [4,8,9].  
68 Furthermore, even these protective traits are subject to controversy, which may be caused by  
69 the plethora of genomic mutations and recombination events that have accrued during the  
70 worldwide sub-culturing of the original BCG strain [5,6,10,11].

71 One possible reason for sub-optimal protection by BCG and other candidate vaccines is the  
72 absence or secretion defect of certain immunogenic proteins. *M. tuberculosis* secretes many  
73 proteins through its different secretion systems, including Sec-translocation (Sec), Twin-  
74 arginine-translocation (Tat), or Type VII secretion (T7S) systems [12,13]. *M. tuberculosis*  
75 possesses five different T7S systems called ESX-1 to ESX-5 [14]. The first T7S system to be  
76 discovered was ESX-1, identified by the Region of Difference (RD)1 deletion in BCG [15],  
77 responsible for the loss of ESX-1-mediated secretion in this vaccine strain [16,17]. Substrates  
78 of the ESX-1 system are responsible for the rupture of mycobacterium-containing  
79 phagosomes and represent a major virulence factor of pathogenic mycobacteria [18–21].  
80 Corresponding to this information, the expression of the ESX-1 secretion system in BCG  
81 increased protective activity, but was also associated with increased pathogenesis [22].  
82 Interestingly, a recently developed recombinant BCG strain expressing ESX-1 of  
83 *Mycobacterium marinum* was able to induce cytosolic pattern recognition and better  
84 protective responses, without a significant increase in virulence [23]. Similarly, the vaccine  
85 candidate MTBVAC was recently shown to induce immune responses to selected ESX-1  
86 substrates and this ability was found to be the major determinant of improved protective  
87 efficacy as compared to BCG [24].

88 While the ESX-1 system is the best studied T7S system in mycobacteria, the ESX-5 system  
89 has the largest repertoire of substrates [25–27]. The ESX-5 system is essential for slow-  
90 growing mycobacteria, because of its role in outer membrane permeability [26,28]. Therefore,  
91 this system is present and considered functional in BCG. The coding sequences of the  
92 potential substrates of the ESX-5 system together form almost 8% of the coding potential of  
93 the *M. tuberculosis* genome [29]. Most notable amongst the ESX-5 substrates are the PE and  
94 PPE proteins, named for the proline and glutamic acid residues in their N-terminal domains.  
95 Defined functions have been described for some PE-PPE proteins, such as the lipase LipY  
96 [30,31] and PPE10, the latter of which is important for capsular integrity of *M. marinum* [32].  
97 Furthermore, many studies have ascribed immunomodulatory functions to PE-PPE proteins,  
98 such as altering host cytokine responses by interaction with Toll-like receptors or inhibition of  
99 antigenic presentation [33–36]. However, most PE and PPE proteins have no known functions  
100 and their high degree of homology makes them difficult to study. The latter is especially true  
101 for the two most-recently evolved subgroups of ESX-5 substrates, *i.e.* the PE\_PGRS and PPE-  
102 MPTR proteins. Both these sub-groups are characterized by their GC-rich DNA sequences,  
103 repetitive glycine-rich amino acid motifs and high molecular weight ranging up to ~4500 kDa  
104 [27,29].

105 We recently identified the PPE protein PPE38 and its highly similar duplicated variant  
106 PPE71, as essential factors in the secretion of both the PE\_PGRS and PPE-MPTR proteins, in  
107 both *M. marinum* and *M. tuberculosis* [37]. The genes encoding PPE38 and PPE71 are  
108 organized in a 4-gene locus that also includes the *esxX* and *esxY* genes (Figure1A), which  
109 however are not required for PE\_PGRS secretion in *M. tuberculosis* strain CDC1551 [37].  
110 Strains with naturally occurring, or engineered, loss-of-function mutations of the *ppe38*-locus  
111 were unable to secrete both PE\_PGRS and PPE-MPTR proteins and were more virulent in a  
112 mouse infection model [37]. Indeed, deletion of the *ppe38*-locus occurred at the branching  
113 point of modern Beijing (Lineage 2) strains and may have aided in their global dispersal [37].  
114 Moreover, the *ppe38*-locus was previously shown to be a hypervariable genetic region and  
115 many strains within the *M. tuberculosis* complex (MTBC) have polymorphisms in this locus  
116 [38]. The most well-known of these polymorphisms is the deletion of the RD5 region from  
117 BCG and several other animal-adapted strains of the MTBC [38,39].

118 The biological impact of the RD5 deletion has been a controversial subject of research and  
119 has focused solely on the phospholipase C encoding genes *plcABC*. Deletion of *plcABC* was  
120 reported to either attenuate [40] or increase virulence of *M. tuberculosis* [41]. However, a

121 more recent study of the *plc*-genes in different mouse and cellular models showed no relevant  
122 contribution of these genes to the virulence of *M. tuberculosis* [42].

123 Here, we investigated the effect of RD5-like polymorphisms of the *ppe38*-locus in a number  
124 of MTBC-branches and discovered that the RD5 deletions in animal-adapted strains and the  
125 BCG vaccine strains have profound effects on the repertoire of secreted substrates in these  
126 strains. Restoration of PPE38-dependent secretion results in a wider antigenic repertoire of  
127 BCG, whereby the identification of two immunogenic epitopes in one of the substrates, *i.e.*  
128 the PPE-MPTR protein PPE10, has allowed us to monitor the immunological impact of the  
129 corresponding secretion characteristics on host immune responses.

130

131 **Results**

132 **Variation in PE\_PGRS secretion in MTBC lineages and outgroups indicate genome**  
133 **sequence errors**

134 The genetically most-distant tubercle bacilli are represented by the *Mycobacterium canettii*  
135 clade. This outgroup mirrors the genomic diversity likely present within the ancestor of *M.*  
136 *tuberculosis* before branching and clonal expansion of the MTBC [43]. Recent studies of *M.*  
137 *canettii* have improved our understanding of adaptations that have shaped the transition from  
138 an *M. canettii*-like ancestor into extant *M. tuberculosis*, such as the gain of surface  
139 hydrophobicity through loss of lipooligosaccharide production [44] and the apparent loss of  
140 the capacity to exchange chromosomal DNA in the MTBC [45]. Interestingly, the available  
141 genome sequence information of five *M. canettii* isolates revealed potential polymorphisms in  
142 the *ppe38*-locus [43]. While strains D, K and L all possessed copies of the *ppe38* and *ppe71*  
143 genes, the sequence of strain J in the database indicated the potential absence of *ppe38* and  
144 *ppe71* from the strain. Such a deletion would be expected to affect PE\_PGRS secretion [37].  
145 However, secretion analysis revealed that all 5 isolates secreted PE\_PGRS proteins  
146 (Supplemental Figure 1A). Subsequent PCR analysis confirmed the presence of a complete  
147 *ppe38-71* locus, similar to *M. tuberculosis* H37Rv, for all tested *M. canettii* strains, including  
148 strain J (Supplemental Figure 1B). It is likely that the sequence polymorphisms in the  
149 previously deposited dataset may have arisen due to automated sequence assembly-associated  
150 bio-informatic artefact, which is a known problem for this region [37,38].

151 Another interesting group of strains, which were reported to have major polymorphisms in the  
152 RD5/*ppe38*-locus, was recently described by Lee et al. [46]. The Inuit population of the  
153 Nunavik region in Canada is affected by high levels of tuberculosis incidence. The majority of  
154 all cases in this cohort were shown to have resulted from the introduction of a single,  
155 particular *M. tuberculosis* strain, about one century ago. This sublineage was defined by  
156 genomic deletions, two of which affect the *ppe38* locus. A 5,759bp RD5-like deletion  
157 removed the three phospholipase C genes *plcABC* and truncated *ppe38* (Figure 1A). The other  
158 *ppe* gene in this locus, *ppe71* (*mt2422*), was reported to be affected by 22bp frameshift  
159 deletion (Figure 1A)[46]. Reinvestigation of the sequence of *ppe71* by inspection of the whole  
160 genome sequence data, and by PCR and Sanger sequence analysis, revealed that this deletion  
161 was in fact a 21bp deletion causing a 7 amino-acid deletion (PPE38 Amino acid 354-  
162 MGGAGAG-361) instead of a frameshift. This deletion has been previously described to  
163 occur also in other strains of *M. tuberculosis*, including CDC1551 (MT2422 -

164 [http://www.genome.jp/dbget-bin/www\\_bget?mtc:MT2422](http://www.genome.jp/dbget-bin/www_bget?mtc:MT2422)) [38]. To test whether the RD5-  
165 like polymorphism (CDC1551-D17) negatively affects PE\_PGRS secretion, five strains with  
166 and one strain without this deletion were subjected to secretion analysis by immunoblotting.  
167 All strains exhibited similar secretion levels of both PE\_PGRS proteins and the ESX-1  
168 substrate EsxA, as compared to reference strain CDC1551 (Supplemental Figure 1B). These  
169 data show that the PPE71 variant carrying the MGGAGAG-deletion is able to sustain  
170 PE\_PGRS secretion levels in *M. tuberculosis*, independently of truncation of PPE38.  
171 Furthermore, there is no apparent phenotypic difference when *M. tuberculosis* has one or two  
172 functional copies of PPE38/71.

173

#### 174 **RD5 deletions in animal-adapted strains and in *M. bovis* BCG block PE\_PGRS secretion**

175 A striking amount of different RD5-like polymorphisms are present in the animal-adapted  
176 lineages/ecotypes of *M. tuberculosis* complex. These strains share their most recent common  
177 ancestor with *M. africanum* Lineage 6 [47,48], which is reported to have two copies of  
178 *ppe38/ppe71* [49]. *Mycobacterium pinnipedi*, a pathogen for seals and sea lions, has one intact  
179 copy of the *ppe38* gene, but no *esxXY*-genes (Figure 1A). *M. bovis* and *Mycobacterium*  
180 *caprae* share an identical RD5 deletion, while *Mycobacterium orygis* possesses a unique RD5  
181 deletion (Figure 1A) [38,50,51]. To investigate the effect of RD5 deletions on PE\_PGRS  
182 secretion in animal-adapted strains, we performed secretion analysis of *M. bovis*, *M. caprae*,  
183 *M. orygis* and *M. pinnipedi* (Figure 1B). As expected, *M. pinnipedi* was the only tested  
184 species able to secrete PE\_PGRS proteins in concordance with the presence of one functional  
185 copy of *ppe38* (Figure 1B). In contrast, *M. bovis*, *M. caprae* and *M. orygis* were deficient in  
186 PE\_PGRS secretion, while EsxA secretion was not affected and no marked cell lysis occurred  
187 (Figure 1B). Intracellular PE\_PGRS expression was detected in strains with a secretion defect  
188 and was strikingly different between isolates (Figure 1B).

189 Since *M. bovis* and *M. caprae* share the same RD5 deletion with *M. bovis* BCG, we  
190 hypothesized that this vaccine strain is also deficient in PE\_PGRS secretion (Figure 1A).  
191 Indeed, five different *M. bovis* BCG isolates, which were selected for their relative genetic  
192 distance [6,10], were all deficient in PE\_PGRS secretion (Figure 1C). It is of interest to note  
193 that *M. bovis* BCG Tice secretes higher levels of the ESX-5 substrates PPE41 and EsxN  
194 (Figure 1 C), likely because of its genetic duplication of the *esx-5* genetic locus [10].  
195 However, despite this ESX-5 duplication, BCG Tice is unable to secrete PE\_PGRS proteins.

196 The PE\_PGRS secretion defect of BCG was not restored in a previously constructed BCG  
197 strain with a cosmid containing the complete RD5 region of *M. tuberculosis* H37Rv  
198 (Supplemental Figure 1C) [16]. In contrast, introduction of the *ppe38-71* locus from *M.*  
199 *tuberculosis* on an integrative plasmid constitutively expressing these genes under control of  
200 the *hsp60* promoter [37], partially restored PE\_PGRS secretion of recombinant *M. bovis*  
201 BCG. This finding was especially surprising since emergence of RD5-deleted *M. bovis*/*M.*  
202 *caprae* progenitor strains likely dates back thousands of years [47]. The obtained *ppe38-71*-  
203 complemented *M. bovis* BCG Copenhagen strain was named BCG38.

204 Taken together, our data show that the different BCG vaccines are all deficient for the  
205 secretion of PE\_PGRS proteins and that this is at least partly revertible by complementation  
206 with the *ppe38-71* locus of *M. tuberculosis*. Based on our previous work, this secretion defect  
207 is expected to affect up to 89 proteins classified as PE\_PGRS or PPE-MPTR [27,37].

208

209 **Secretion of PE\_PGRS/PPE-MPTR proteins in *M. tuberculosis* or BCG does not alter**  
210 **phenotypic and functional maturation of host innate immune cells, or antigenic**  
211 **presentation.**

212 The ability to restore PPE38-dependent secretion in *M. bovis* BCG allowed us to investigate  
213 to what extent this secretion defect affects properties of the BCG vaccine. Many of the 89  
214 members of the PE\_PGRS and PPE-MPTR proteins have been suggested to perform  
215 biological roles in virulence and immune modulation, although the molecular mechanisms  
216 and biological relevance remain unestablished for most of these [14,27,33,34]. Increasing the  
217 repertoire of immunogenic proteins secreted by BCG could lead to increased protection, since  
218 protein secretion by mycobacteria is essential for the efficient induction of protective CD4<sup>+</sup> T-  
219 cell responses [22,52–55]. However, restoring secretion of proteins that have been proposed  
220 to exhibit immunomodulatory functions could also decrease efficacy of the vaccine strain. In  
221 particular, recent reports suggest that PPE38 itself downregulates Major Histocompatibility  
222 Complex class-I (MHC-I) expression in murine macrophages [56] and that PE\_PGRS47  
223 inhibits autophagy and is responsible for reducing MHC-II-restricted antigen presentation  
224 during *in vivo* infection of mice [35].

225 We set out to establish whether presence of PPE38 and the ability to secrete PE\_PGRS  
226 and PPE-MPTR proteins, affected phenotypic and functional maturation of infected murine  
227 innate immune cells. Bone marrow-derived dendritic cells (BM-DCs) of C57BL/6 mice were



228 infected (MOI = 0.5) with i) *M. tuberculosis* CDC1551, ii) an isogenic deletion-mutant of the  
229 complete *ppe38-71* locus ( $\Delta ppe38-71$ ), iii) or a complemented strain (*ppe38-71-C*) [37] and  
230 were tested in parallel with *M. bovis* BCG Copenhagen and the isogenic strain expressing  
231 *ppe38-71* (BCG38). All the infected BM-DCs exhibited a clear upregulation of co-stimulatory  
232 markers CD40, CD80 and CD86, as well as modulation of MHC-I (H-2K<sup>b</sup>) and MHC-II (I-  
233 A<sup>b</sup>) expression, compared to uninfected controls. However, no differences in the induction of  
234 any such phenotypic maturation markers could be observed for the different isogenic WT and  
235 recombinant strains (Figure 2, Supplemental Table 1). Quantification of several inflammatory  
236 cytokines in the culture supernatants of the infected BM-DCs showed highly similar levels of  
237 TNF $\alpha$ , IL-12p40/70 and IL-6 production induced by the isogenic strains of BCG and *M.*  
238 *tuberculosis* (Figure 2B). These results indicate that PPE38-dependent secretion defects are  
239 unlikely to have a major effect on the phenotypic or functional maturation of DCs, even  
240 though many PE\_PGRS and PPE-MPTR proteins have previously been suggested to perform  
241 such biological roles [33,35].

242 In addition, we assessed whether PPE38-dependent protein secretion influences MHC-  
243 II-restricted presentation of other mycobacterial antigens. Such a phenotype might possibly be  
244 caused by a direct effect on the host phagocytes due to restored PE\_PGRS secretion [35,36],  
245 or by competition in the hosts antigen presentation machinery upon secretion of the large  
246 number of PPE38-dependent substrates. To test this hypothesis, BM-DCs were infected with  
247 serial two-fold dilutions of *M. tuberculosis* (CDC1551) or the isogenic  $\Delta ppe38-71$  deletion or  
248 complemented strains, as well as BCG or BCG38. MHC-II restricted T-cell hybridomas  
249 specific to FbpA (Ag85A<sub>101-120</sub>) or EsxH (TB10.4<sub>74-88</sub>) T-cell epitopes were added after  
250 overnight infection and washing. IL-2 secretion in culture medium was quantified by ELISA  
251 as a measure of antigen presentation and hybridoma T-cell activation. T-cell hybridomas  
252 specific for both FbpA (Figure 2C, upper panel) and EsxH (lower panel) produced higher  
253 levels of IL-2 in response to *M. tuberculosis* strains compared to BCG strains. However, no  
254 differences were observed between isogenic strains with, or without, functional PPE38-  
255 dependent PE\_PGRS/PPE-MPTR secretion. These data show that PPE38-dependent  
256 PE\_PGRS/PPE-MPTR secretion does not reduce MHC-II-restricted antigen presentation of  
257 other mycobacterial antigens by the host DCs.

258 Together, these results suggest that introduction of PPE38 and restoration of  
259 PE\_PGRS secretion do not negatively affect phenotypic and functional maturation of innate  
260 immune cells, or their capacity to present antigen to CD4<sup>+</sup> T cells.

261

262 **Restoration of PPE38-dependent PE\_PGRS/PPE-MPTR protein secretion in BCG does**  
263 **not impact protection potential against *M. tuberculosis* in mice**

264 Since we found no evidence suggesting that antigen presentation of mycobacterial antigens by  
265 DCs is negatively affected by restoration of PPE38-dependent secretion, we hypothesized that  
266 the enlarged repertoire of secreted proteins in BCG38 could increase its vaccine potential  
267 compared to the parental BCG. In parallel, we hypothesized that the capsule of BCG could be  
268 altered upon restoration of PPE38-dependent secretion. We recently reported that transposon  
269 insertions in the gene encoding an ESX-5 associated chaperone (*espG<sub>5</sub>*), or in the PPE-MPTR  
270 encoding gene *ppe10* (*mmar\_0761*), reduce capsule integrity of *M. marinum* [32]. Similarly,  
271 an *eccC<sub>5</sub>::tn* mutant in the *M. tuberculosis* strain CDC1551, completely deficient in ESX-5  
272 secretion, also exhibited reduced capsule integrity [32,57]. Since PPE10 is dependent on  
273 PPE38 for its secretion [37], we hypothesized that restoration of PPE10 secretion might  
274 positively affect capsule integrity. The presence of an intact capsule on BCG, achieved by  
275 culturing in detergent-free growth medium, has recently been shown to be important for a  
276 more potent immune response and could therefore be relevant for the protective efficacy of  
277 BCG38 [58].

278 To test both hypotheses, C57BL/6 mice were subcutaneously (s.c.) immunized with 1 million  
279 CFU of either BCG, or BCG38, cultured either in shaking condition in the presence of  
280 0.025% Tween-80, or in unperturbed conditions without detergent. Four weeks post-  
281 immunization, mice were challenged by an aerosol infection of *M. tuberculosis* H37Rv  
282 (bacterial load: 680 CFU/lung at Day 1, prepared without detergent). Mice were killed four  
283 weeks post infection, at which time lungs and spleens were harvested and assessed for  
284 bacterial burdens by CFU counting. An approximate 100-fold reduction in bacterial lung  
285 burdens was achieved by all conditions of vaccination irrespective of the presence of  
286 detergent, or the BCG vs BCG38 vaccine strains (Figure 3A). This reduction of bacterial lung  
287 burden coincided with improved macroscopic state of the lungs (Supplemental Figure 2A).  
288 Similarly, an approximately 10-fold reduction in spleen CFUs and reduction in splenomegaly  
289 was detected in the vaccinated mice irrespective of the method of vaccine preparation (Figure  
290 3A, Supplemental Figure 2B). No significant ( $p < 0.05$ ) differences in bacterial burdens were  
291 observed between any of the four tested conditions in either the spleens or lungs. Together,  
292 these results show that restoration of PPE38-dependent PE\_PGRS/PPE-MPTR secretion in  
293 BCG does not significantly improve protection against *M. tuberculosis* in the murine model

294 used. Moreover, we did not find a significant difference in protective efficacy between  
295 conventional and detergent-free preparation of either BCG or BCG38, suggesting that  
296 capsular integrity is not altered or does not affect protection in this model.

297

## 298 **Identification of immunogenic T-cell epitopes of the PPE-MPTR protein PPE10**

299 Secretion of T7S-mediated mycobacterial proteins is essential to induce host CD4<sup>+</sup> T-cell  
300 responses and the great majority of immunogenic and protective antigens of *M. tuberculosis*  
301 are secreted proteins [59]. Many of the known immunodominant antigens are PE and PPE  
302 proteins and these form an integral part in a number of subunit or recombinant vaccines  
303 [52,60–63]. Therefore, the finding that restoration of PPE38-dependent PE\_PGRS/PPE-  
304 MPTR secretion in BCG did not significantly affect protective efficacy was surprising,  
305 particularly as up to 89 individual proteins are predicted to be concerned. In order to explain  
306 these unexpected data, we reflected on our hypotheses and found additional variables that  
307 could affect the assumptions on which they are based. In particular, while PPE-MPTR  
308 secretion was shown to be strictly dependent on PPE38 in both *M. marinum* and *M.*  
309 *tuberculosis*, we had no direct evidence of PPE-MPTR secretion in BCG38. In contrast to  
310 PPE-MPTR proteins, PE\_PGRS proteins may not contain immunodominant epitopes or be  
311 protective antigens [64–67]. Furthermore, although previous studies have found a strict  
312 correlation between *in vitro* secretion and the capability to induce CD4<sup>+</sup> T-cell responses  
313 [23,52,63], it is conceivable that the PPE38-dependant substrates are still membrane, or  
314 surface, associated in *ppe38-71*-deficient strains and thereby remain able to induce T-cell  
315 responses.

316 Since tools to study PPE-MPTR proteins are scarce and currently insufficient to answer the  
317 questions above, we set out to develop an immunological approach to study PPE-MPTR  
318 secretion and their immunogenicity in more detail. We selected PPE10 as a model MPTR-  
319 protein, because PPE10 is predicted to be the most ancestral MPTR protein in mycobacteria  
320 [27]. The PPE domain covers the N-terminal 181 residues of PPE10 and is highly similar to  
321 other PPE proteins. The middle of the protein contains a typical MPTR repeat domain, which  
322 is very similar to other MPTR proteins. The C-terminus contains a domain unique to PPE10,  
323 which is secreted *in vitro* [25,32,37]. PPE10 is also of biological interest, since it is detected  
324 *in vivo* in guinea pig lungs and this protein is required for capsular integrity of *M. marinum*  
325 [32,68]. We set out to assess whether PPE10 has the potential to induce CD4<sup>+</sup> T-cell mediated

326 immune responses in mice. To increase the likelihood of identifying immunogenic epitopes,  
327 we immunized not only C57BL/6 mice, but also C57BL/6 x CBA (H-2<sup>b/k</sup>) F1 mice, which  
328 express a more diverse repertoire of MHC restricting elements. While C57BL/6 mice only  
329 express a single MHC-II molecule (I-A<sup>b</sup>), C57BL/6 x CBA F1 mice can potentially express  
330 six different MHC-II variants (Supplemental Table 2). Mice were s.c. immunized with wild-  
331 type *M. tuberculosis* H37Rv and were killed three weeks later. Splenocytes were isolated and  
332 stimulated *in vitro* with a peptide library consisting of sixty 15-mers with a 5-amino acid  
333 shifting frame spanning PPE10<sub>181-487</sub> of *M. tuberculosis* H37Rv [29,69]. None of the sixty  
334 peptides were able to induce specific T-cell mediated IFN- $\gamma$  responses by splenocytes from  
335 unimmunized mice or immunized C57BL/6 mice (Supplemental Figure 3). However, two  
336 peptides were immunogenic in the C57BL/6 x CBA (H-2<sup>b/k</sup>) F1 mice and induced high levels  
337 of IFN- $\gamma$ , similar to the positive control peptide ESAT-6<sub>1-20</sub> (Figure 4, Supplemental Figure  
338 3). Interestingly, one of these immunogenic peptides (PPE10<sub>221-235</sub>: GSGNTGSGNLGLGNL)  
339 was situated in the MPTR domain of PPE10, while the other (PPE10<sub>381-395</sub>:  
340 NVLNSGLTNTTPVAAP) was derived from the PPE10-specific C-terminal domain. The  
341 MPTR peptide PPE10<sub>221-235</sub> has 17 close homologues within the *M. tuberculosis* genome  
342 (identity > 65%, but no 100% homologues), while this was not the case for PPE10<sub>381-395</sub>  
343 (Supplemental Table 3). These results show that immunization with *M. tuberculosis* induces  
344 immune responses against PPE10 and that this response can be elicited both against the  
345 PPE10-specific C-terminal domain or the MPTR domain.

346

#### 347 **Deletion of *ppe10* does not significantly alter protein secretion of other Type VII** 348 **secretion substrates in *M. tuberculosis***

349 The newly identified immunogenic peptides derived from PPE10 are a tool that allowed us to  
350 answer different questions regarding the PPE-MPTR proteins. First, to determine the  
351 specificity and cross-reactivity of the epitopes, we constructed a deletion mutant of *ppe10*  
352 (*Rv0442c*) in the *M. tuberculosis* CDC1551 background by homologous recombination and  
353 phage transduction (Supplemental Figure 4) [70]. In contrast to *M. marinum-ppe10::tn* [32],  
354 no altered colony morphology or other growth phenotype was observed in *M. tuberculosis*-  
355  $\Delta ppe10$ . This finding is in concordance with the absence of such a phenotype in ESX-5  
356 mutants of *M. tuberculosis* and highlights this as a species-specific difference between *M.*  
357 *marinum* and *M. tuberculosis* [32,57,71].

358 We performed biochemical secretion analysis on the *Δppe10* strain in parallel with the strains  
359 that were examined for their immunogenic potential (see below). This secretion analysis  
360 confirmed the expected PE\_PGRS secretion defects of BCG, *M. tuberculosis-Δppe38-71* and  
361 *eccC5::tn*, which were restored in the complemented strains, *i.e.* *ppe38-71-C* and BCG38  
362 (Supplemental Figure 4C) [37,57]. As expected, BCG and BCG38 were deficient in secretion  
363 of the ESX-1 substrate EsxA (ESAT-6) and exhibited only low levels of PPE41 and EsxN.  
364 The increase of PPE41 secretion in BCG38 compared to the parental strains (Figure 1C) was  
365 consistent in this experiment and other replicates. In contrast to a previous report, we found  
366 that *M. tuberculosis Δppe25-pe19* did secrete PPE41 and EsxN, which may be due to  
367 differences in bacterial growth conditions and/or methods in protein extraction and detection  
368 [71]. This strain harbors intact genes coding for the ESX-5-membrane complex [57,72] and is  
369 able to induce *in vivo* CD4<sup>+</sup> T-cell responses against PE and PPE proteins, in contrast to the  
370 general ESX-5 deficient strain *ΔeccD5* in the same background [52,63]. The *Δppe10* strain  
371 showed no difference in PE\_PGRS secretion. Similarly, secretion of EsxA and EsxN was not  
372 affected by deletion of *ppe10*. Although slightly elevated levels of PPE41 secretion were  
373 observed, we concluded from these combined data that *M. tuberculosis-Δppe10* does not have  
374 a general supersecretion phenotype as was previously reported for *M. marinum-ppe10::tn*  
375 [32].

376

### 377 **BCG and *M. tuberculosis-Δppe38-71* are unable to induce immune responses against** 378 **PPE10**

379 To assess the specificity of the newly identified PPE10 epitopes and to better understand the  
380 effect of the *ppe38*-dependent secretion on immunogenicity, we immunized C57BL/6 x CBA  
381 F1 mice with the different *M. tuberculosis* and BCG strains for which the secretion phenotype  
382 was characterized (Supplemental Figure 4C). Three weeks post-immunization, splenocytes  
383 were collected and stimulated with the PPE10<sub>221-235</sub> and PPE10<sub>381-395</sub> peptides, as well as  
384 purified protein derivate (PPD - a positive control for immunization by Mycobacteria) and a  
385 number of known antigenic peptides derived from proteins secreted via ESX-1 (EsxA<sub>1-20</sub> [73]  
386 and CFP-10<sub>11-25</sub> [74]), ESX-5 (PE19<sub>1-18</sub> and PPE25<sub>1-20</sub> [52]) or the twin-arginine-translocation  
387 (TAT) pathway (Ag85A<sub>241-260</sub>) [75,76]. As expected, splenocytes of mice immunized with *M.*  
388 *tuberculosis* CDC1551 produced high levels of IFN- $\gamma$  after stimulation with PPE10<sub>221-235</sub>,  
389 PPE10<sub>381-395</sub> or all other immunogenic peptides, but not when incubated with a negative  
390 control peptide (*E. coli* MalE<sub>100-114</sub>), or the medium control (Figure 5). Splenocytes from

391 unimmunized mice did not react against any of the peptides or PPD and only produced IFN- $\gamma$   
392 upon simulation by Concanavalin A (ConA). The  $\Delta ppe10$  deletion strain did not induce IFN- $\gamma$   
393 production in response to either PPE10<sub>221-235</sub>, or PPE10<sub>381-395</sub>, whereas responses against the  
394 other peptides were unaffected (Figure 5). Unexpectedly, this result shows that both of the  
395 newly identified PPE10 peptides are highly specific, even though we hypothesized cross-  
396 reactivity to occur for PPE10<sub>221-235</sub>, because of the high similarity to other MPTR domains  
397 (Supplemental Table 3). As expected, the ESX-5 secretion mutant *eccC5::m* did not induce T-  
398 cell responses against the ESX-5 substrates PE19, PPE25 and PPE10, further confirming that  
399 the export of these antigens by the ESX-5 secretion system is indispensable for the induction  
400 of T-cell immune responses [52,63]. Importantly,  $\Delta ppe38-71$  was not able to induce  
401 immunogenicity against either of the PPE10 epitopes, a phenotype that was fully reverted in  
402 the complemented strain *ppe38-71-C*. This confirms that secretion and *in vivo*  
403 immunogenicity of PPE10 as a model PPE-MPTR protein are dependent on PPE38 in the *M.*  
404 *tuberculosis* CDC1551 background, which we were previously unable to assess. Similar to  
405  $\Delta ppe38-71$ , also BCG was completely unable to induce immune responses against either of  
406 the PPE10 epitopes. In contrast, BCG38 induced immunogenicity against both PPE10  
407 epitopes at similar levels to the *M. tuberculosis* isolates. Together, these results clearly  
408 confirm that the secretion and *in vivo* immunogenicity of the ancestral PPE-MPTR protein  
409 PPE10 is strictly dependent on PPE38. These data also provide evidence that the *in vitro*  
410 observed PPE38-dependence of PE\_PGRS and PPE-MPTR proteins is a phenotype that can  
411 be directly translated to the *in vivo* situation. Here, we show that the vaccine strain BCG is  
412 unable to induce T-cell responses against the ancestral PPE-MPTR protein PPE10, because of  
413 the deletion of its *ppe38-71*-locus as part of RD5.

414 Finally, we compared the results obtained for the different WT and recombinant BCG strains  
415 with a recently developed attenuated *M. tuberculosis* strain, deleted for 5 *pe/ppa* genes in the  
416 *esx-5* locus, named *Mtb* $\Delta ppe25-pe19$  [71]. Genes encoding the ESX-5 secretion core  
417 machinery [57,72] are intact in this strain, as is the *ppe38* gene, a finding which is confirmed  
418 by the fact that this strain induced T-cell responses against both PPE10 epitopes. This result  
419 highlights that attenuated *M. tuberculosis* vaccine strains may avoid certain *M. bovis* related  
420 secretion differences that result in immunogenic properties.

421

422 **Prime-boost vaccination regimen to improve PPE10-specific immune responses does not**  
423 **increase protection against *M. tuberculosis*.**

424 The results of our epitope mapping analysis showed that C57BL/6 mice were unable to  
425 develop T-cell responses against PPE10, which could provide an explanation for the lack of  
426 improved protection conferred by BCG38 compared to BCG. Therefore, we set out to perform  
427 a similar experiment in these C57BL/6 x CBA F1 mice. In order to maximize any potential  
428 increase in PPE-MPTR-specific immune responses, this experiment was designed to boost  
429 vaccination of BCG or BCG38 with the immunogenic peptides PPE10<sub>221-235</sub> and PPE10<sub>381-395</sub>  
430 (Figure 6A). Sixty days after s.c. vaccination with BCG strains, a booster of peptides  
431 formulated in the adjuvant CpG(DOTAP), or the adjuvant alone, was administered s.c..  
432 Twenty-nine days later, a second booster was administered intranasally. Nine days after this  
433 intranasal boost, mice were challenged by an aerosol challenge of *M. tuberculosis* H37Rv.  
434 Mice were killed 28 days later and both lung and spleen bacterial burdens were assessed  
435 (Figure 6B, C). No significant differences were observed among the groups of vaccinated  
436 animals. Only a modest decrease in spleen CFUs was achieved by any of the vaccination  
437 regimens. This reduction was not significant ( $p < 0.05$ ) for BCG-vaccinated mice and injected  
438 with the adjuvant alone, but was significant for the three other groups (Ordinary one way  
439 ANOVA – Dunnett’s test of multiple comparisons against a single control). However, no  
440 significant differences between any of the vaccinated groups was detected (Ordinary one way  
441 ANOVA, Tukey’s test of multiple comparisons). Vaccination with all regimens reduced lung  
442 CFU values at least 10-fold. In fact, vaccination with BCG38, boosted with PPE10-derived  
443 immunogenic peptides, had the highest average bacterial lung burden of the four different  
444 vaccination regimens. These data clearly oppose our hypothesis, that restoring the lack of  
445 PPE-MPTR immune responses in BCG increases its protective efficacy.

446 Together, we could find no evidence of an immunomodulatory effect of PPE38-dependent  
447 proteins. Inversely, restoration of BCG’s capacity to secrete PE\_PGRS and PPE-MPTR  
448 proteins and thereby enlarging the PE\_PGRS/PPE-MPTR antigenic repertoire of BCG, did  
449 not result in improved vaccine protection in two mouse models.

450

## 451 Discussion

452 We previously demonstrated that loss-of-function mutations in the *ppe38*-locus of *M.*  
453 *tuberculosis* block PE\_PGRS and PPE-MPTR secretion and increase virulence in a mouse  
454 model [37]. In this work, we examined the correlation of known *ppe38* deletions in other  
455 lineages of the MTBC with a PE\_PGRS/PPE-MPTR secretion defect. We hypothesized that

456 the success of certain clinical isolates of Lineage 4, could perhaps be explained by their RD5-  
457 like deletion, which includes *ppe38* [46,77]. However, secretion analysis of these Lineage 4  
458 strains revealed that a single copy of PPE71 carrying a the MGGAGAG-deletion, is still  
459 functional and sufficient to support PE\_PGRS secretion. Similarly, although intriguing  
460 differences in protein secretion levels were observed between *M. canettii* strains, we found  
461 that all analyzed strains secreted PE\_PGRS proteins. The anticipated polymorphisms in the  
462 *ppe38*-locus of selected *M. canettii* strains [43] were likely caused by a sequence assembly  
463 problem of repetitive sequences. These results highlight the difficulties of bio-informatic  
464 analyses of this locus, which is hampered by the high sequence similarity between *ppe38* and  
465 *ppe71*, that seem to cause already some discrepancies between the reference genomes of *M.*  
466 *tuberculosis* H37Rv and CDC1551 [29,37,38,78].

467 In contrast, our investigation of RD5-like polymorphisms did reveal that multiple  
468 members of the animal adapted lineage of the MTBC are completely devoid of PE\_PGRS  
469 secretion because of their RD5 deletion. It should be emphasized that the RD5-like deletion of  
470 *M. orygis* occurred independently of that of *M. bovis* and *M. caprae*. Furthermore, even more  
471 members of the animal adapted lineage, such as *M. microti*, *M. suricattae* and the Dassie  
472 Bacillus, are reported to have independent RD5-like deletions, which we hypothesize to also  
473 block PE\_PGRS and PPE-MPTR secretion [38,79–81]. Together, these findings suggest a  
474 specific selective advantage associated to loss of the *ppe38*-locus and its associated secretion  
475 phenotype in certain animal adapted strains. The modern Beijing strains, also defective in  
476 PPE38-dependent secretion, have expanded concurrently with increased human population  
477 densities and mobility [82]. These changes in the host-population alter the optimal balance  
478 between virulence/infectivity and lower the advantage to stay dormant or subclinical in the  
479 host [83]. It is tempting to speculate that the loss of PPE38 and its associated secretion and  
480 virulence phenotype has helped ancestral *M. tuberculosis* strains derived from human hosts, to  
481 adapt towards survival and transmission in a new host niches.

482 We were surprised that we were able to restore the secretion defect of BCG by  
483 introducing the *ppe38*-locus from *M. tuberculosis*. Since the RD5 deletion of BCG already  
484 occurred in the most-recent common ancestor of *M. bovis* and *M. caprae*, this deletion likely  
485 dates back millennia [47]. Furthermore, the 13 years of *in vitro* culturing by Calmette and  
486 Guérin to create BCG and the ensuing decades of culturing while it was distributed worldwide  
487 has caused accumulation of even more mutations [6,10,11]. Still, introduction of the



488 integrative vector constitutively expressing the *ppe38*-locus was clearly able to restore both  
489 PE\_PGRS and PPE-MPTR secretion in BCG.

490 Our newly identified immunogenic epitopes in the PPE-MPTR protein PPE10, provide  
491 a tool to gain more understanding about this group of proteins. Firstly, although previous  
492 work only definitively detected the C-terminal domain of PPE10 to be secreted [25,32,37],  
493 immunization with *M. tuberculosis* also clearly induced immune responses against the  
494 MPTR-associated epitope. This provides evidence that the MPTR domain is accessible to the  
495 host antigen presentation machinery and that these repetitive domains have the potential to  
496 contain functional T-cell epitopes. Furthermore, wild-type BCG and *M. tuberculosis* with  
497 impaired PPE38-dependent secretion were completely unable to induce immune responses  
498 against PPE10, similar to a general ESX-5 secretion mutant. This is important evidence that  
499 PPE38 is essential for the translocation of PPE-MPTR proteins through the ESX-5 secretion  
500 machinery *in vivo* and that without PPE38, these proteins are not surface associated or  
501 otherwise accessible to the immune system.

502 It is perhaps striking that the PE\_PGRS and PPE-MPTR secretion defect of BCG has  
503 not been previously reported, considering the amount of research done on this vaccine. Based  
504 on the available literature on PE\_PGRS and PPE-MPTR proteins, it is logical to hypothesize  
505 that a vaccine strain that does not secrete these proteins might in fact be a relatively effective  
506 vaccine. Many immunomodulatory properties have been attributed to PE\_PGRS and PPE-  
507 MPTR proteins [14,33,34,62]. Perhaps the most relevant of these, is the reported function of  
508 certain PE\_PGRS proteins to inhibit antigen presentation [35,36]. If PE\_PGRS proteins  
509 indeed inhibit antigen presentation, it would be highly detrimental to introduce a vaccine that  
510 secretes these proteins. Notably, this is an urgent question since a number of novel  
511 tuberculosis vaccine candidates based on attenuated *M. tuberculosis* are currently in clinical  
512 or pre-clinical development. We showed for one of these candidate vaccines (*i.e.* *M.*  
513 *tuberculosis*- $\Delta$ *ppe25-pe19*), that PE\_PGRS and PPE-MPTR secretion is indeed fully  
514 functional [52,63,71]. Our isogenic  $\Delta$ *ppe38-71* strains of *M. tuberculosis* and the BCG38  
515 strain form an ideal tool to answer such questions and to understand more about these proteins  
516 as a group. In this work, we did not find any evidence of inhibition of antigen presentation in  
517 strains secreting PPE38-dependent substrates, or lack thereof in strains without PPE38.  
518 Similarly, and in contrast to many reports of immunomodulatory effects of PE\_PGRS  
519 proteins, we did not find any evidence of differential immune modulation by strains with, or  
520 without, functional PPE38-dependent secretion. More specifically, no differences were

521 observed in DC maturation [84], MHC-I or -II expression [56] or cytokine production [85–  
522 87]. Finally, PE\_PGRS and PPE-MPTR proteins have often been implicated as mycobacterial  
523 virulence factors [14,34,35,88,89]. The previously described increased virulence in strains  
524 lacking PPE38-dependent secretion, including the hypervirulent Beijing isolates, put this  
525 work in perspective [37]. Here, we bolster our previously published evidence that strains  
526 without PPE38, including a number of animal adapted species and the BCG vaccine, are truly  
527 unable to translocate these proteins. Although many of these animal adapted strains have  
528 reduced virulence in humans compared to *M. tuberculosis*, they are clearly pathogenic for  
529 their natural host and should not be seen as attenuated [90]. This is in line with a role for  
530 PPE38-dependent substrates as virulence attenuating factors [37]. Therefore, the biological  
531 roles of the PE\_PGRS and PPE-MPTR proteins that are reported to be required for virulence,  
532 may not require secretion of these effector proteins or might in certain cases be due to indirect  
533 effects on other proteins. This hypothesis is further supported by the fact that many of the  
534 studies that attribute virulence traits to PE\_PGRS and PPE-MPTR proteins, are performed in  
535 *M. smegmatis*, which lacks an ESX-5 secretion system and is unable to secrete these proteins  
536 [27,33,72]. Further work on the biological function of PE\_PGRS and PPE-MPTR proteins,  
537 either on an individual basis or grouped, will have to take into account these findings and  
538 critically assess the impact of localization on effector function.

539         Perhaps the most relevant finding of this work is that BCG is unable to secrete  
540 PE\_PGRS and PPE-MPTR proteins and therefore does not raise T-cell responses against  
541 these proteins. Previous studies have shown that antibodies can be raised against PE\_PGRS  
542 proteins, suggesting that it could be a beneficial property of a vaccine to secrete these proteins  
543 [25,91,92]. Here we provide evidence that PPE-MPTR proteins can be immunogenic in mice,  
544 which is further supported by a recent publication investigating immunogenicity of the PPE-  
545 MPTR protein PPE39 [67]. Kim et al. identified two immunogenic epitopes of which one  
546 (MTBK\_24820<sub>85-102</sub>) is located in the PPE-domain and has high homology to non-MPTR PPE  
547 proteins, while the other (MTBK\_24820<sub>217-234</sub>) was located in the MPTR domain of this  
548 protein. Interestingly, the authors reported that vaccination with the recombinant PPE39  
549 protein induced a higher level of protection against *M. tuberculosis* Erdman, compared to a  
550 hypervirulent Beijing isolate [67]. This difference could be explained by our data, which  
551 would suggest immune responses against that MPTR epitope would not be helpful against a  
552 PPE38-deficient Beijing isolate. A related issue that requires further work is whether the

553 PPE38-dependent secretion effect in modern Beijing isolates is somehow related to that of the  
554 BCG vaccine and whether their respective secretion defects affect vaccine efficacy.

555         There is strong evidence for the importance of PPE-MPTR proteins in human immune  
556 responses, because the PPE-MPTR protein PPE42 (Rv2608) is an integral part of the subunit  
557 fusion-protein vaccine candidate ID93 [60,66]. The fusion protein ID93 consists of four  
558 different proteins and has been tested as a vaccine candidate in both a Phase 1 and Phase 2A  
559 clinical trial [93,94]. Bertholet et al. 2008 demonstrated that PBMCs isolated from PPD<sup>+</sup>  
560 healthy subjects produced IFN- $\gamma$  in response to PPE42 and that almost 70% of subjects  
561 showed a reaction against the recombinant protein in a recall experiment [66]. Interestingly,  
562 100% of PPD<sup>+</sup> subjects exhibited recall responses against the other (non-MPTR) PPE proteins  
563 that were tested, which could possibly be explained by exposure to modern Beijing, or other  
564 PPE38-deficient strains, in the subject cohort. PPE42 was selected as part of the ID93 vaccine  
565 due to its excellent ability to induce both humoral and cellular immune responses and  
566 immunization with PPE42 provided protection in mice almost comparable to BCG [60,66]. In  
567 Guinea pigs, ID93 significantly boosted the protection induced by BCG, which was  
568 interpreted as an ability to boost immune responses elicited by BCG [60]. However, based on  
569 our work it should be assumed that BCG does not induce immune responses against the PPE-  
570 MPTR protein PPE42 and that boosting with ID93 may in fact broaden antigenic repertoire of  
571 the combined vaccination. Similarly, ID93 is able to induce protective immune responses to  
572 the *M. tuberculosis* Beijing isolate HN878, but it is unclear what the role of PPE42 is in this  
573 response. The analyses performed in Bertholet et al. 2010 and Baldwin et al. 2015 were  
574 performed with the four-gene fusion protein ID93 and not with the individual PPE42 subunit,  
575 which makes it impossible to assess these questions more thoroughly. What remains clear  
576 however, is that the PPE-MPTR protein PPE42 is an important part of a vaccine currently in  
577 clinical trials. The finding that ID93 includes a protein to which parental BCG is likely not  
578 able to induce immune responses, may actually put the proven booster qualities of this  
579 vaccine candidate in a different light and lead to optimal strategies to employ it.

580 The question whether immune responses against PPE38-dependent proteins are important for  
581 a vaccine to be protective against tuberculosis, needs an urgent answer, especially since it  
582 concerns a total of 89 proteins. There are multiple vaccine candidates in clinical, or pre-  
583 clinical, development that are based on attenuated *M. tuberculosis* strains and which likely  
584 secrete PE\_PGRS and PPE-MPTR proteins [24,52,62,63,71,95]. Should we knock-out *ppe38-*  
585 *71* in these vaccine candidates to avoid immune modulation by the secreted substrates, or

586 should we prioritize these vaccine candidates, because they have a broader potential repertoire  
587 of epitopes? Should BCG vaccination be boosted by vaccine candidates including PPE-MPTR  
588 proteins such as ID93, or should this be avoided? Are there differences between designing  
589 vaccine candidates against strains secreting PE\_PGRS/PPE-MPTR proteins and those with a  
590 PPE38-dependent secretion defect, such as the modern Beijing isolates? Are murine or other  
591 small animal infection models appropriate to predict PE\_PGRS and PPE-MPTR-mediated  
592 impact on vaccine efficacy? These are questions that we are not yet able to answer in this  
593 work, but they reveal the need to increase our understanding of PE\_PGRS and PPE-MPTR  
594 proteins. Better knowledge on PE\_PGRS/PPE-MPTR proteins is not just an intellectual goal,  
595 but may also help to make more informed decisions in the design of novel vaccines against  
596 tuberculosis.

597 **Acknowledgements**

598 The authors would like to thank Alexandre Pawlik and Fiona McIntosh for help. We also  
599 thank Michal Brennan for initially sharing a clone producing PE\_PGRS antibody. We thank  
600 Robyn Lee and Anzaan Dippenaar for data analysis. We thank James Gallant, Maroeska  
601 Burggraaf and Edith NG Houben for insightful discussions.

602

603 **Funding statements**

604 LSA and RB acknowledge the support by grants ANR-14-JAMR-001-02, ANR-10-LABX-  
605 62-IBEID, and ANR-16-CE35-0009 and the European Union's Horizon 2020 Research and  
606 Innovation Program grant 643381.

607

608 The funders had no role in study design, data collection and analysis, decision to publish, or  
609 preparation of the manuscript.

610

611 **Conflict of interest**

612 LM and RB are named inventors on a patent related to RD1, RD5 and RD8 regions of BCG.  
613 MAB is a named inventor on a separate patent related to genomic differences of the  
614 *Mycobacterium tuberculosis* complex. The other authors declare that no financial or  
615 competing interests exist.

616

617 **Ethical approval**

618 Studies in immunocompetent mice were performed according to European and French  
619 guidelines (Directive 86/609/CEE and Decree 87– 848 of 19 October 1987) after approval by  
620 the Institut Pasteur Safety, Animal Care and Use Committee (Protocol 11.245) and local  
621 ethical committees (CETEA 2012–0005 and CETEA 2013–0036).

## 622 **Figure Legends**

623 **Figure 1: RD5-like genetic deletions in the *M. tuberculosis* complex and their effect on**  
624 **PE\_PGRS secretion.** A) The genetic organization of the RD5 locus in *M. tuberculosis* strains  
625 CDC1551 and H37Rv is depicted in colored arrows. Bars below the genes indicate the size  
626 and location of different RD5-like and *ppe38*-deletions examined in this work. Arrows above  
627 the genes indicate primers used in this study to verify the presence of RD5 associated genes,  
628 sequences can be found in Supplementary Table 4. Functional PE\_PGRS secretion is  
629 indicated by shading of the strain name in green, while red shading represents strains in which  
630 PE\_PGRS secretion is not functional (based on immunoblot analysis). Figure adapted from  
631 Mc Evoy et al. 2009 with permission from the authors [38]. B) Immunoblot secretion analysis  
632 of animal-adapted MTBC strains verifies that strains with RD5 deletions do not secrete  
633 PE\_PGRS proteins. C) Immunoblot secretion analysis of five genetically divergent BCG  
634 isolates confirms the PE\_PGRS secretion defect in all BCG isolates. Cop. 38 indicates the  
635 strain *M. bovis* BCG Copenhagen, transformed with vector pMV::*ppe38-71* and is hereafter  
636 referred to as BCG38. Full western blots corresponding to panels depicted in B-C are depicted  
637 in Supplemental Figure 5.

638

639 **Figure 2: Secretion of PPE38 and PE\_PGRS/PPE-MPTR proteins in BCG or *M.***  
640 ***tuberculosis* does not alter phenotypic and functional maturation, or antigen**  
641 **presentation by innate immune cells.** A) BM-DCs (C57BL/6, H-2<sup>b</sup>) infected with the  
642 indicated mycobacterial strains were stained for surface expression of co-stimulation markers  
643 CD40, CD80 and CD86, or MHC components I-A<sup>b</sup> and H-2K<sup>b</sup>. Depicted are the cell counts  
644 (Y-axis) and fluorescent intensity (X-axis) as quantified by flow cytometric analyses.  
645 Quantification of mean fluorescent intensity and quantification of cell survival can be found  
646 in Supplemental Table 1. B) Culture supernatant of the experiment described in A was  
647 assessed for the presence of cytokines IL-12p40/70, IL-6 and TNF- $\alpha$ . No differences were  
648 detected between cells infected with the isogenic BCG or *M. tuberculosis* isolates. C)  
649 Antigenic presentation by infected DCs is not affected by disruption or restoration of PPE38-  
650 dependent protein secretion in *M. tuberculosis* or BCG. BM-DCs (BALB/c, H-2<sup>d</sup>) were  
651 infected with two-fold dilutions (data points in graph) of the indicated *M. tuberculosis* or  
652 BCG strains starting at MOI=10 (indicated by black arrow). IL-2 production was quantified  
653 by ELISA after overnight co-culture with I-E<sup>d</sup>-restricted T-cell hybridoma specific for FbpA

654 (Ag85A<sub>101-120</sub> (2A1), upper panel) or with I-A<sup>d</sup>-restricted T-cell hybridoma specific for EsxH  
655 (TB10.4<sub>74-88</sub> (1G1), lower panel). Data are representative of biological duplicates.

656

657 **Figure 3: Restoring PPE38-dependent protein secretion of BCG does not increase**  
658 **protection against *M. tuberculosis* in C57BL/6 mice.** Lung (A) or spleen (B) bacterial  
659 burdens of C57BL/6 mice infected with *M. tuberculosis* H37Rv via aerosol administration.  
660 Mice were vaccinated s.c. four weeks before the challenge, with 1 x 10<sup>6</sup> CFU/mouse of either  
661 BCG or BCG38 (indicated in green). Both strains were prepared, either in standard culture  
662 conditions in medium containing 0.025% Tween-80 considered as no capsule (indicated with  
663 (-)), or in culture allowing capsule formation/retention in detergent free condition (indicated  
664 with (+)). Photographs of the assessed organs are depicted in Supplemental Figures 2A, B.  
665 Each data point represents the CFU/organ of one single mouse counted and averaged from  
666 two technical duplicates. Error bars depict the standard deviation. Differences between  
667 different vaccination conditions were non-significant ( $p>0.05$ ), but all vaccination conditions  
668 were statistically different from the unimmunized control group ( $p<0.01$ ). Significance was  
669 calculated with Prism software using ordinary one-way ANOVA followed by Tukey's test for  
670 multiple comparisons.

671

672 **Figure 4: Epitope mapping of PPE10 identifies two novel immunogenic T-cell epitopes.**  
673 C57BL/6 H-2<sup>b</sup> (black) or C57BL/6 x CBA (H-2<sup>b<sup>k</sup></sup>) F1 mice (B6CBAF1, blue) were  
674 immunized s.c. with 1 x 10<sup>6</sup> CFU/mouse of *M. tuberculosis* H37Rv (*Mtb*, filled bars), or were  
675 left non-immunized (N.I. empty bars). Three weeks post-immunization, splenocytes were  
676 restimulated with control peptides or a library of 15-mers spanning PPE10 excluding the PPE  
677 domain. T-cell mediated IFN- $\gamma$  responses were quantified by ELISA as a measure of  
678 immunogenicity. Two immunogenic PPE10-peptides were identified (PPE10<sub>221-235</sub> &  
679 PPE10<sub>381-395</sub>) in B6CBAF1 mice. Error bars depict standard deviation over two technical  
680 replicates. This figure depicts only newly identified epitopes and controls. Full results of the  
681 pep-scan epitope mapping can be found in Supplemental Figure 2.

682

683 **Figure 5: Ability of mycobacteria to induce T-cell responses against PPE-MPTR protein**  
684 **PPE10 is dependent on functional ESX-5- and PPE38-dependent secretion.** C57BL/6 x

685 CBA F1 mice were immunized with the indicated mycobacterial strains. Three weeks post-  
686 immunization, splenocytes were stimulated with the indicated peptides and IFN- $\gamma$  production  
687 was measured by ELISA. Responses to the newly identified PPE10-derived immunogenic  
688 peptides are depicted in blue. Error bars represent the standard deviation over two technical  
689 duplicates. The results are representative two biological replicates performed on different  
690 timepoints.

691

692 **Figure 6: Boosting PPE10 specific immune responses does not increase protection**  
693 **against *M. tuberculosis*.** A) Graphical representation of the prime-boost vaccination protocol.  
694 Mice were immunized with either BCG or BCG38 (Green). 60 days post-infection (d.p.i.)  
695 C57BL/6 x CBA F1 mice were injected s.c. with a booster consisting of adjuvant  
696 CpG(DOTAP), alone or in combination with a mix of PPE10<sub>221-235</sub> and PPE10<sub>381-395</sub> peptides  
697 (blue). The same formulation was intranasally administered four weeks later. Nine days after  
698 the intranasal boost, mice were exposed to *M. tuberculosis* H37Rv aerosol infection (220  
699 CFU/lung 1 d.p.i). Bacterial lung (B) and Spleen (C) burdens were assessed by dilution and  
700 counting 4 weeks post-infection (experimental end-point) after being photographed for  
701 macroscopic investigation (Supplemental figures 2C, D). Each data point represents the CFU  
702 value of one organ from a single mouse, error bars depict the standard deviation. No  
703 significant differences between the vaccination conditions were detected by ordinary one-way  
704 ANOVA followed by Tukey's test of multiple comparisons. All vaccination conditions  
705 resulted in a significant ( $p < 0.01$ ) reduction in lung burden compared to unimmunized control.  
706 Reduction in spleen CFUs was not significant for any of the vaccination conditions. Statistical  
707 analyses were performed using PRISM software.

708

709 **Supplemental Figure 1: Immunoblot secretion analysis reveals no PPE38-dependent**  
710 **secretion effect in *M. canetti*, or *M. tuberculosis* Mj-sublineage Lineage 4 strains**  
711 **affecting the Nunavik Inuit.** Immunoblots of whole-cell lysates or culture filtrates of the  
712 indicated *M. canetti* (A), *M. tuberculosis* (B) or BCG (C) isolates [43,46]. A) Although  
713 differences in protein secretion could be observed between different *M. canetti* isolates (A-J),  
714 all isolates exhibited PE\_PGRS secretion. B) PE\_PGRS secretion of Mj-sublineage strains  
715 with a deletion affecting *ppe38*, but not *ppe71* (Lanes 4-8) was not discernible from Lineage 4  
716 control isolate CDC1551 or an isolate from the same cohort without this deletion (MT13848).



717 C) Introduction of plasmid pMV::*ppe38-71* in BCG complemented PE\_PGRS secretion  
718 (BCG38), while complementation was not observed when performed with pYUB::RD5, even  
719 though presence of genetic presence of RD5 was PCR-confirmed with primers RD5B-  
720 plcA.int.F/R [47]. Anti-SigA staining is used as a lysis control in A, while anti-GroEL2 is  
721 used in B and C. Strain details can be found in Supplemental Table 5. Full blots of panels A-C  
722 are depicted in Supplemental Figure 6.

723

724 **Supplemental Figure 2: Harvested lungs and spleens from vaccinated and *M.***  
725 ***tuberculosis* infected mice.** Organs depicted in A and B correspond to the experiment  
726 depicted in Figure 3. Organs depicted in C and D correspond to the experiment depicted in  
727 Figure 6. After photography of the lungs (A, C), a single lung lobe was used for lung CFU  
728 quantification. Splenomegaly (B, D) was reduced, by all vaccination conditions, but did not  
729 differ markedly between vaccination conditions.

730

731 **Supplemental Figure 3: Epitope mapping of a peptide library identifies two PPE10**  
732 **epitopes that are immunogenic in C57BL/6 x CBA mice.** IFN- $\gamma$  production in response to  
733 peptides covering the indicated amino acid positions of PPE10 (Rv0442c) in C57BL/6  
734 (grey/green) or C57BL/6 x CBA F1 (B6CBAF1, blue/brown) mice. Mice were immunized  
735 with *M. tuberculosis* H37Rv (left) or unimmunized (right).

736

737 **Supplemental Figure 4: Construction and secretion analysis of *M. tuberculosis***  
738 **CDC1551- $\Delta$ *ppe10*.** A) Schematic representation of deletion strategy and primers. The genetic  
739 region around PPE10, as taken from tuberculist, is depicted in colored arrows [69]. Flanking  
740 fragments used for homologous recombination are depicted in black bars. Left (PPE10KO-LF  
741 and PPE10KO-LR) and right (PPE10KO-RF and PPE10KO-RR) flanking regions were  
742 amplified by primers depicted in black. Primers used to verify successful homologous  
743 recombination are depicted in dark blue. All primer sequences can be found in Supplemental  
744 Table 4. B) PCR verification of successful homologous recombination in seven different  
745 colonies that grew on hygromycin selection plates. Colony 1 was taken for further analyses.  
746 C) Immunoblot analysis of strains tested for immunogenicity in Figure 5. Samples were  
747 prepared as described in materials and methods section. SigA was used as a loading in lysis

748 control. Some lysis could be found in both BCG and BCG38, but was not markedly different  
749 between strains. Full gels and blots used to create B and C are depicted in Supplemental  
750 Figure 7

751

752 **Supplemental Figure 5: Full blots corresponding to panels depicted in Figure 1B-C.**

753 **Supplemental Figure 6: Full blots corresponding to panels depicted in Supplemental**  
754 **Figure 1A-C.**

755 **Supplemental Figure 7: Full blots and gels corresponding to panels depicted in**  
756 **Supplemental Figure 4B-C.**

|                          | <b>CD40</b> | <b>CD80</b> | <b>CD86</b> | <b>H-2K<sup>b</sup></b> | <b>I-A<sup>b</sup></b> | <b>% Live<br/>Cells</b> |
|--------------------------|-------------|-------------|-------------|-------------------------|------------------------|-------------------------|
| <b>Uninfected</b>        | 218         | 338         | 264         | 663                     | 904                    | 94.9                    |
| <b>CDC1551</b>           | 282         | 449         | 427         | 982                     | 1404                   | 82.5                    |
| <b><i>Δppe38-71</i></b>  | 287         | 424         | 446         | 925                     | 1360                   | 81.7                    |
| <b><i>ppe38-71-C</i></b> | 303         | 457         | 454         | 969                     | 1419                   | 81.5                    |
| <b>BCG</b>               | 273         | 430         | 390         | 810                     | 1348                   | 86.6                    |
| <b>BCG38</b>             | 276         | 429         | 381         | 832                     | 1417                   | 86.8                    |

757

758 **Supplemental Table 1:** Mean Fluorescent Intensities and percentage of live C57BL/6 BM-  
759 DCs, infected (MOI = 0.5) with indicated strains of *M. tuberculosis* or *M. bovis* BCG with or  
760 without the *ppe38*-locus. As expected, the percentage of live cells was higher for BCG-  
761 infected cells than for cells infected with *M. tuberculosis* strains, but did not vary significantly  
762 between isogenic strains ( $\leq 1.0$  % difference between isogenic strain). These values are  
763 derived from the experiment depicted in Figure 2A.

|                                                         | <b>MHC-II</b>                                                  | <b>MHC-II</b>                                                   | <b>MHC-II</b>                                                           | <b>MHC-II</b>                                                  |
|---------------------------------------------------------|----------------------------------------------------------------|-----------------------------------------------------------------|-------------------------------------------------------------------------|----------------------------------------------------------------|
| <b>MHC Haplotype H-2<sup>b</sup></b> (C57BL/6 mice)     | I-A <sub>α</sub> <sup>b</sup>                                  | I-A <sub>β</sub> <sup>b</sup>                                   | <del>I-E<sub>α</sub><sup>b</sup></del>                                  | I-E <sub>β</sub> <sup>b</sup>                                  |
| <b>Functional MHC-II available in H-2<sup>b</sup></b>   | I-A <sub>α</sub> <sup>b</sup> I-A <sub>β</sub> <sup>b</sup>    |                                                                 | No I-E available in H-2 <sup>b</sup>                                    |                                                                |
| <b>MHC Haplotype H-2<sup>k</sup></b> (CBA mice)         | I-A <sub>α</sub> <sup>k</sup>                                  | I-A <sub>β</sub> <sup>k</sup>                                   | I-E <sub>α</sub> <sup>k</sup>                                           | I-E <sub>β</sub> <sup>k</sup>                                  |
| <b>Functional MHC-II available in H-2<sup>k</sup></b>   | I-A <sub>α</sub> <sup>k</sup> I-A <sub>β</sub> <sup>k</sup>    |                                                                 | I-E <sub>α</sub> <sup>k</sup> I-E <sub>β</sub> <sup>k</sup>             |                                                                |
| <b>H-2<sup>b/k</sup></b> (C57BL/6 x CBA)                | I-A <sub>α</sub> <sup>b</sup><br>I-A <sub>α</sub> <sup>k</sup> | I-A <sub>β</sub> <sup>b</sup><br>I-A <sub>β</sub> <sup>k</sup>  | <del>I-E<sub>α</sub><sup>b</sup></del><br>I-E <sub>α</sub> <sup>k</sup> | I-E <sub>β</sub> <sup>b</sup><br>I-E <sub>β</sub> <sup>k</sup> |
| <b>Functional MHC-II available in H-2<sup>b/k</sup></b> | Not only                                                       | I-A <sub>α</sub> <sup>b</sup> I-<br>A <sub>β</sub> <sup>b</sup> | I-A <sub>α</sub> <sup>k</sup><br>I-A <sub>β</sub> <sup>k</sup>          | I-E <sub>α</sub> <sup>k</sup><br>I-E <sub>β</sub> <sup>k</sup> |
|                                                         | But also                                                       | I-A <sub>α</sub> <sup>b</sup> I-<br>A <sub>β</sub> <sup>k</sup> | I-A <sub>α</sub> <sup>k</sup><br>I-A <sub>β</sub> <sup>b</sup>          | I-E <sub>α</sub> <sup>k</sup><br>I-E <sub>β</sub> <sup>b</sup> |

764

765 **Supplemental Table 2:** Why there are more MHC-II restricting molecules available in  
766 C57BL/6 x CBA F1 mice than in C57BL/6 or CBA mice. A promoter mutation disrupts  
767 production of I-E<sub>α</sub><sup>b</sup> in C57BL/6 mice (Grey font with strikethrough), which are therefore  
768 unable to produce MHC-II I-E (Grey). In contrast, H-2<sup>k</sup> mice can produce both I-A<sub>α</sub><sup>k</sup> I-A<sub>α</sub><sup>k</sup>  
769 and I-E<sub>α</sub><sup>k</sup> I-E<sub>α</sub><sup>k</sup>. C57BL/6 x CBA F1 mice have an even bigger repertoire of possible  
770 functional MHC-II isoforms available due to recombination between the subunits.

| <b>Epitope<br/>PPE10<sub>221-235</sub></b> | <b>Protein<br/>Number</b> | <b>Amino acid<br/>Sequence Identity</b> | <b>Sequence identity<br/>(100%)</b> |
|--------------------------------------------|---------------------------|-----------------------------------------|-------------------------------------|
| PPE10                                      | Rv0442c                   | GSGNTGSGNLGLGNL                         | 100                                 |
| PPE13                                      | Rv0878c                   | GSGNEGSGNLGFGNL                         | 86.7                                |
| PPE39                                      | Rv2353c                   | GFGNTGSGNFGFGNT                         | 80.0                                |
| PPE53                                      | Rv3159c                   | GSGNTGSTNFGGGNL                         | 80.0                                |
| PPE16                                      | Rv1135c                   | GSGNDGNGNFGLGNI                         | 73.3                                |
| PPE21                                      | Rv1548c                   | GSGNLGSGNIGFGNK                         | 73.3                                |
| PPPE56                                     | Rv3350c                   | GLGNVGDGNLGLGNI                         | 73.3                                |
| PPE40                                      | Rv2356c                   | GFGNTGSGNFGFGNT                         | 73.3                                |
| PPE55                                      | Rv3347c                   | GSGNVGFGNMGVGNL                         | 66.7                                |
| PPE34                                      | Rv1917c                   | GIGNTGTGNFGIGNS                         | 66.7                                |
| PPE6                                       | Rv0305c                   | GIGNSGTGNFGLGNT                         | 66.7                                |
| PPE8                                       | Rv0355c                   | GIGNTGTGNIGFGNT                         | 66.7                                |
| PPE5                                       | Rv0304c                   | GIGNTGTGNFGIGNS                         | 66.7                                |
| PPE62                                      | Rv3533c                   | GTGNAGSGNIGAGNT                         | 66.7                                |
| PPE54                                      | Rv3343c                   | GSGNVGSYNVGAGNV                         | 66.7                                |
| PPE24                                      | Rv1753c                   | GFGNLGSNNVGVGNL                         | 66.7                                |
| PPE42                                      | Rv2608                    | ASGNLGSNVGVGNL                          | 66.7                                |
| PPE64                                      | Rv3558                    | GAGNVGTGNIGFGNQ                         | 60.0                                |
| PPE35                                      | Rv1918                    | GIGNAGANNFGLANL                         | 60.0                                |

771

| <b>Epitope<br/>PPE10<sub>381-395</sub></b> | <b>Protein<br/>Number</b> | <b>Amino acid<br/>Sequence Identity</b> | <b>Sequence identity<br/>(100%)</b> |
|--------------------------------------------|---------------------------|-----------------------------------------|-------------------------------------|
| PPE10                                      | Rv0442c                   | NVLNSGLTNTTPVAAP                        | 100                                 |
| PPE12                                      | Rv0755c                   | GFLNSGLTNTGFANS                         | 60.0                                |
| PPE8                                       | Rv0355c                   | GLLNAGLVNTGIANP                         | 53.3                                |

772

773 **Supplemental Table 3:** Sequence identity determined by BlastP search of immunogenic  
774 epitopes against the genome of *M. tuberculosis* H37Rv [29,96]. Black letters indicate identical  
775 amino acids. Red letters indicate non-identical amino acids. Top: homologues of the MPTR-  
776 containing peptide PPE10<sub>221-235</sub> ordered by percentage of sequence identity. Bottom:  
777 Homologues of the peptide PPE10<sub>381-395</sub>, which is part of the C-terminal secreted domain of  
778 PPE10.

779 **Supplemental Table 4: Primers used in this study**

| <b>Primer name</b> | <b>Sequence 5'→3'</b>                  |
|--------------------|----------------------------------------|
| RD5B-plcA.int.F    | CAAGTTGGGTCTGGTCGAAT [47]              |
| RD5B-plcA.int.R    | GCTACCCAAGGTCTCCTGGT [47]              |
| PPE38F             | TTTTTCGGTGTGGATTGTCT [38]              |
| PPE38R             | CCAGGGATTTCCAACGAC [38]                |
| PPE10 KO LF        | TTTTTTTTTCAGCTTCTGACCGGCGCCAACATCGTGAA |
| PPE10 KO LR        | TTTTTTTTTCAGAGACTGCCTGGCGAACGTCCTCAACT |
| PPE10 KO RF        | TTTTTTTTTCAGTTCCTGACGGAGCCAAGCGACGCTAT |
| PPE10 KO RR        | TTTTTTTTTCAGAAACTGCTCGACCGCACTGGCATTCA |
| PPE10(mtb) flank F | GAACAGCGACTCCGACTACG                   |
| PPE10(mtb) flank R | CTCGACCGCACTGGCATTCA                   |
| p0004s-HL          | AGGATCCAGGACCTGCCAAT                   |
| p0004s-HR          | CTTCACCGATCCGGAGGAAC                   |

780

781 **Supplemental Table 5: Bacterial strains used in this study**

| Species                                   | Strain code         | reference            | Notes                                   |
|-------------------------------------------|---------------------|----------------------|-----------------------------------------|
| <i>Mycobacterium canettii</i>             | STB-A               | [43]                 |                                         |
| <i>Mycobacterium canettii</i>             | STB-D               | [43]                 |                                         |
| <i>Mycobacterium canettii</i>             | STB-J               | [43]                 |                                         |
| <i>Mycobacterium canettii</i>             | STB-K               | [43]                 |                                         |
| <i>Mycobacterium canettii</i>             | STB-L               | [43]                 |                                         |
| <i>Mycobacterium bovis</i>                | CVL<br>AF2122/97    | [97]                 |                                         |
| <i>Mycobacterium caprae</i>               | 140080001           |                      | Pasteur strain collection               |
| <i>Mycobacterium orygis</i>               | 802564              | [51]                 | Pasteur strain collection               |
| <i>Mycobacterium pinnipedii</i>           | 140090001           |                      | Pasteur strain collection               |
| <i>Mycobacterium bovis</i> BCG            | BCG Pasteur         | [5,6]                |                                         |
| <i>Mycobacterium bovis</i> BCG            | BCG Danish          | [5,6]                |                                         |
| <i>Mycobacterium bovis</i> BCG            | BCG Tice            | [5,6]                |                                         |
| <i>Mycobacterium bovis</i> BCG            | BCG Tokyo           | [5,6]                |                                         |
| <i>Mycobacterium bovis</i> BCG            | BCG Russia          | [5,6]                |                                         |
| <i>Mycobacterium bovis</i> BCG            | BCG38               | This study           | BCG Danish - pMV::ppe38-71              |
| CDC1551                                   |                     |                      |                                         |
| CDC1551 $\Delta$ mt2419-22                | $\Delta$ ppe38-71   | [37]                 |                                         |
| CDC1551 $\Delta$ mt0458                   | $\Delta$ ppe10      | This study           |                                         |
| CDC1551 $\Delta$ mt2419-22, pMV::ppe38-71 | $\Delta$ ppe38-71-C | [37]                 | $\Delta$ ppe38-71 - pMV::ppe38-71       |
| CDC1551 <i>eccC5::tn</i>                  | <i>eccC5::tn</i>    | BEI resources & [57] | BEI resources strain: JHU1783-2086      |
| H37Rv wild-type                           |                     |                      | Reference strain                        |
| H37Rv $\Delta$ ppe25-pe19                 | $\Delta$ ppe25-pe19 | [71]                 |                                         |
| MT13848                                   |                     | [46]                 | Clinical strain, Sublineage Mn          |
| MT5531                                    |                     | [46]                 | Clinical strain, Sublineage Mj-III.a    |
| MT4854                                    |                     | [46]                 | Clinical strain, Sublineage Mj-III.b    |
| MT140                                     |                     | [46]                 | Clinical strain, Sublineage Mj-IV.c     |
| MT4884                                    |                     | [46]                 | Clinical strain, Sublineage Mj-V.a      |
| MT3000                                    |                     | [46]                 | Clinical strain, Sublineage Mj-V.c      |
| BCG::RD5                                  |                     | [16]                 | BCG Pasteur containing cosmid pYUB::RD5 |

782

## 783 **Materials and methods**

### 784 **Strains and growth conditions**

785 All strains used in the study and the sources they are derived from can be found in  
786 supplemental table 5. Unless otherwise specified, all mycobacterial strains were grown on  
787 Middlebrook 7H11 solid medium (Difco) supplemented with OADC (BD Biosciences), or  
788 liquid 7H9 medium supplemented with ADC supplement and 0.05% Tween-80. Antibiotics  
789 were added where opportune at a concentration of 50µg/ml for Hygromycin (Euromedex), or  
790 25µg/ml for Kanamycin (Sigma). Strains were incubated at 37°C. Liquid cultures were grown  
791 in shaking conditions at 80 rotations per minute. For animal-adapted strains *M. bovis*, *M.*  
792 *caprae*, *M. orygis* and *M. pinnipedii*, 0.2% w/v of Pyruvate (Sigma) was added to the growth  
793 medium [98]. Infection stocks of *M. tuberculosis* H37Rv used for aerosol infection  
794 experiments and BCG or BCG38 vaccination stocks without Tween-80 were prepared by  
795 inoculating 0.1 OD/ml bacteria in 100ml liquid culture without Tween-80. This culture was  
796 incubated for 7 days, after which it was washed with phosphate buffered saline (PBS) and  
797 sonicated (5x (100 pulses of 0.1s)) and left to rest for at least one hour before collecting the  
798 cell suspension considered to obtain a single-cell solution of encapsulated mycobacteria.  
799 Standard vaccination stocks were prepared in Dubos medium containing 0.025% Tween-80 in  
800 standing conditions and were harvested at an optical density between 0.4 and 0.7 OD<sub>600</sub>/ml.

801

### 802 **PCR verification of RD5 deletions**

803 RD5 deletions were PCR verified by previously published primers specific for *plcA* (*rv2351c*  
804 - Supplemental Table 4), which produce a product of approximately 500bp when this gene is  
805 present [47]. Primers amplifying the *ppe38-71*-locus (Supplemental Table 4) produce a  
806 3378bp product when the complete *ppe38-71* locus is present [38]. This includes two copies  
807 of *ppe38/71* (*mt2419/mt2422*) flanking the *esxX* (*mt2420*) and *esxY* (*mt2421*) in between in  
808 CDC1551. When only one copy of *ppe38* and no *esxX/esxY* are present this PCR produces a  
809 product of approximately 1500 bp [38].

810

### 811 **Recombinant strains and mutant construction**

812 The complementation plasmid containing the *ppe38*-locus from CDC1551 (*mt2419-22*) under  
813 expression of *hsp60* promoter was previously described [37]. The cosmid containing the RD5



814 region (pYUB::RD5) was part of the library described by Bange et al. 1999 and contains the  
815 genetic region spanning 2,611 kb – 2,645 kb of the *M. tuberculosis* H37RV reference genome  
816 [29,99].

817 *M. tuberculosis-Δppe10* was constructed as described by Bardarov et al. [70]. The  
818 homologous recombination construct was created by a PCR combining primers PPE10 KO  
819 LF & LR to amplify the 3' end of *rv0442c* and another PCR with primers PPE10 KO RF &  
820 PPE10 KO RR to amplify the 5' end of *rv0442c* (See Supplemental Table 4 for primer  
821 sequences). After phage packaging and infection, seven transformed colonies were tested by  
822 PCR with either primer PPE10(mtb) flank F & p0004s-HR, or PPE10(mtb) flank R &  
823 p0004s-HL (Supplemental Figure 4A, B). All colonies were found to have the correct deletion  
824 spanning from 152bp to 1133bp after the 5' of *rv0442c*. We attempted to complement the  
825 *Δppe10* mutant with a previously published plasmid (p19kPro::*rv0442c*-HA) overexpressing  
826 HA-tagged PPE10 under control of the *lpqH* promotor [25]. Although clones expressing the  
827 HA-tag on this plasmid were obtained, these had a considerable *in vitro* growth defect, which  
828 would conflict with *in vivo* and *in vitro* studies and therefore this complemented strain was  
829 not analyzed further.

830

### 831 **Secretion analysis**

832 Strains were pre-cultured until mid-logarithmic phase under normal growth conditions  
833 (described above). Cultures were washed two times in 7H9 medium without ADC,  
834 supplemented with 0.2% Dextrose and 0.05% Tween and were incubated in this medium for  
835 48 hours. Cultures were centrifuged to separate cells and the supernatant was filtered through  
836 a 0.02µm filter, after which it was TCA-precipitated to concentrate. Cellular material was  
837 washed with PBS, resuspended in solubilisation/denaturation buffer and boiled for 10 min at  
838 95°C. After sterilisation by heating for 2 hours at 80°C, samples were sonicated to disrupt  
839 cells and boiled at 95°C during 10 minutes.

840 Samples were loaded on 12% or 4-12% SDS-Page gels (NuPage®, Novex, Life technologies)  
841 and transferred to nitrocellulose filters by dry western blotting (iBlot®, Invitrogen). Proteins  
842 were stained by primary antibodies: Anti-PGRS 7C4.1F7 [25] (Clone 7C4.1F7 was a kind  
843 gift from Michael J. Brennan, USA), polyclonal anti-SigA (Kind gift from I. Rosenkrantz,  
844 Denmark), Rabbit polyclonal anti-EsxN (rMTb9.9A) [100], monoclonal ESAT-6 (hyb76-8),  
845 or anti PPE41 [101].

846

#### 847 **Cell infection, ELISA and flow cytometry**

848 BM-DCs derived from C57BL/6 (H-2<sup>b</sup>) female mice were generated directly in 6-well plates  
849 and infected at day 6 of culture with different mycobacterial strains at M.O.I of 0.5 in RPMI  
850 1640-GlutaMax medium (Invitrogen) containing 10% FBS (4 x 10<sup>6</sup> cells/well in 4 ml  
851 volume). After over-night of infection at 37°C and 5% CO<sub>2</sub>, IL-6 (clone MP5-20F3 for  
852 coating and clone MP5-32C11 for detection, BD Pharmingen), IL12p40/70 (clone C17.8  
853 RUO, BD Pharmingen) and TNF-α (clone 1F3F3D4 for coating and clone clone XT3/XT22  
854 for detection, eBioscience) cytokine production was quantified in the culture supernatants by  
855 ELISA.

856 For viability and phenotypic maturation evaluation, infected DCs were washed with PBS and  
857 incubated first with Live/Dead-Pacific Blue reagent (Invitrogen) during 35 minutes at 10°C in  
858 the dark. Cells were then washed twice and incubated with appropriate dilution of anti-  
859 CD16/CD32 (2.4G2 mAb, BD Pharmingen) during 20 minutes followed by surface staining  
860 by 30 minutes of incubation with appropriate dilutions of APC-anti-CD11b (BD Pharmingen),  
861 PE-Cy7-anti-CD11c (BD Pharmingen), FITC-anti-CD40 (clone HM40-3, SONY), FITC-anti-  
862 CD80 (B7-1) (clone 16-10A1 Biolegend), FITC-anti-CD86 (B7-2) (clone PO3, SONY),  
863 FITC-anti-MHC-II (I-A/I-E) (clone MS/114.15.2, eBioscience), FITC-anti-MHC-I (H-2k<sup>b</sup>)  
864 (clone AF6-88-5-5-3, eBioscience) or FITC-anti-IgG1k isotype control. The stained cells  
865 were washed twice with FACS buffer (PBS containing 3% fetal bovine serum (FBS) and  
866 0.1% NaN<sub>3</sub>) and then fixed with 4% paraformaldehyde during 18h at 10°C prior to sample  
867 acquisition by a LSR Fortessa flow cytometer system (BD Bioscience) and BD FACSDiva  
868 software. The obtained data were analyzed using FlowJo software (Treestar, OR, USA).

869

#### 870 **Antigen presentation assay**

871 BM-DCs derived from BALB/c (H-2<sup>d</sup>) female mice were used at day 6 of culture as antigen  
872 presenting cells. Cells were seeded in 96-well plates at 5 x 10<sup>4</sup> cells/well and loaded with 1  
873 μg/ml of homologous or negative control synthetic peptides, or infected with different  
874 mycobacterial strains with serial two-fold dilutions of M.O.I., starting at M.O.I. = 10, in  
875 RPMI 1640-GlutaMax medium (Invitrogen) containing 10% FBS. After 18h of infection at  
876 37°C and 5% CO<sub>2</sub>, cells were washed twice with RPMI medium to eliminate the IL-2

877 possibly produced by the infected DCs and then co-cultured with  $1 \times 10^5$  cells/well of T-cell  
878 hybridoma specific to EsxH/TB10.474-88 (1G1) or Ag85A<sub>101-120</sub> (2A1), respectively restricted  
879 by I-A<sup>d</sup> or I-E<sup>d</sup>. After over-night of co-culture at 37°C and 5% CO<sub>2</sub>, the IL-2 secretion was  
880 quantified in the culture supernatants by ELISA (clone JES6-1A12 for coating and clone  
881 JES6-5H4 for detection, BD Pharmingen).

882

### 883 **Epitope mapping of PPE10 and T-cell assay**

884 A peptide library of sixty 15-mers with a 5-amino acid shifting frame, spanning amino acids  
885 181-487 of PPE10 (Rv0442c), was constructed commercially (Mimotopes Europe, United  
886 Kingdom). Epitope screening of PPE10 and immunogenicity assays were performed as  
887 previously described [52], with some modifications. Briefly, 6-8-week-old female C57BL/6  
888 (H-2<sup>b</sup>) or C57BL/6 x CBA F1 (H-2<sup>b/k</sup>) mice were immunized s.c. with  $1 \times 10^6$  CFU/mouse of  
889 different mycobacterial strains obtained from exponential culture in Dubos medium. Epitope  
890 mapping was performed with mice immunized with *M. tuberculosis* H37Rv. Three to four  
891 weeks post-immunization, mice were sacrificed and pool of total splenocytes ( $n = 2$  mice per  
892 group) were restimulated in 96-well flat-bottom plates (TPP, Denmark) at  $5 \times 10^5$  cells per  
893 well in HL-1 medium (Biowhittaker, Lonza, France), complemented with 2 mM GlutaMax  
894 (Invitrogen, Life Technologies, France),  $5 \times 10^{-5}$  M β-mercaptoethanol, 100 U/ml penicillin  
895 and 100 μg/ml streptomycin (Sigma-Aldrich, France) in the presence of 10-20 μg/ml of  
896 individual peptides. IFN-γ production in the supernatant was quantified by ELISA after 72h of  
897 culture at 37°C and 5% CO<sub>2</sub> (clone AN-18 for coating and clone R46A2 for detection), BD  
898 Pharmingen.

899

### 900 **Protection assays**

901 BCG and BCG38 were grown in 10ml Dubos medium or in 100ml 7H9-medium with ADC-  
902 supplement without Tween-80. *M. tuberculosis* H37Rv and BCG-strains cultured without  
903 Tween-80 were sonicated (5 X 100 pulses; 0.1 seconds/pulse; 0.9 seconds' rest; amplitude  
904 30%) to disrupt clumps and were frozen at -80°C. Frozen stocks were counted for CFU's  
905 before immunization to assess dose while the dose of Dubos-grown strains was estimated  
906 based on optical density.

907 Eight-week-old C57BL/6 mice ( $n = 5$  mice/group), were immunized with  $1 \times 10^6$  CFU/mouse  
908 of BCG Danish (cultured - or + Tween-80), or BCG38 (cultured - or + Tween-80) in 200  $\mu$ l  
909 PBS. Eight mice were concurrently injected with sterile PBS. Thirty days after vaccination,  
910 mice were challenged with aerosolized WT *M. tuberculosis* H37Rv strain. Three mice were  
911 sacrificed to assess bacterial lung burdens 1 day post challenge (assessed at 680 CFU/lung).  
912 All other mice were killed four weeks post-challenge due to human end-point criteria of  
913 unvaccinated mice. Lungs and spleens were homogenized by beadbeating, serially diluted in  
914 PBS and plated on 7H11 plates with (Lungs) or without (spleens) BBL™ MGIT™ PANTA™  
915 (Beckton Dickinson, Ireland).

916 The Prime-boost vaccination and challenge experiment was performed similar as above, with  
917 the following modifications. BCG or BCG38 were precultured in Dubos medium and five  
918 first generation C57BL/6 x CBA crossover mice were left unvaccinated or s.c. immunized ( $n$   
919 = 5 mice/group). Eight weeks post-immunization, a subcutaneous boost was administered.  
920 This boost consisted of 200  $\mu$ l/mouse of formulation containing 50  $\mu$ l of each PPE10-derived  
921 peptide (PPE10<sub>221-235</sub> and PPE10<sub>381-395</sub>) ProteoGenix, France, 30  $\mu$ g of CpG 1826  
922 oligodeoxynucleotides as adjuvant (Sigma-Aldrich, France) at 1  $\mu$ l/mL concentration, 60  $\mu$ l of  
923 liposomal transfection reagent DOTAP (N-[1-(2,3-DioleOyloxy)]-N,N,N-Trimethyl  
924 Ammonium Propane methylsulfate, Roche, France) and 10  $\mu$ l Opti-MEM (Life Technologies,  
925 France) as described in Sayes et al., 2016 [63]). Four weeks later, an intranasal boost was  
926 given to mice via intra-nasal route, under anesthesia as described in Sayes et al., 2016, 25  
927  $\mu$ l/mouse contained 10  $\mu$ g of PPE10 peptides, 2  $\mu$ g of CpG at 10  $\mu$ l/mL concentration, 10  $\mu$ l  
928 of DOTAP and 3  $\mu$ l Opti-MEM contained in 20  $\mu$ l/mouse [63]. Ten days after the intranasal  
929 boost, mice were aerosol challenged with WT *M. tuberculosis* H37Rv strain. Three non-  
930 immunized mice were killed one day post challenge to assess infectious dose administered,  
931 which was calculated at 220 CFU/lung. Four weeks later all other mice were killed and one  
932 lung and the spleen were homogenized with a MillMixer organ homogenizer (Qiagen,  
933 Courtaboeuf, France) and plated to assess bacterial burdens on 7H11 Agar medium  
934 supplemented with ADC (Difco, Becton Dickinson). The CFU were counted after 3-4 weeks  
935 of incubation at 37°C.

936 All immunized and infected mice for immunogenicity and protection experiments were placed  
937 and manipulated in isolator in BSL-III protection-level animal facilities at the Pasteur  
938 Institute.

939 To determine the statistical significance of the data, analyses were performed by use of

- 940 GraphPad Prism software (GraphPad Software, La Jolla, CA, USA), using ordinary one-way  
941 ANOVA followed by Tukey's test for multiple comparisons.

942 **References:**

- 943 1. WHO | Global tuberculosis report 2017. WHO. World Health Organization; 2017;  
944 Available: [http://www.who.int/tb/publications/global\\_report/en/](http://www.who.int/tb/publications/global_report/en/)
- 945 2. Arnold A, Witney AA, Vergnano S, Roche A, Cosgrove CA, Houston A, et al. XDR-  
946 TB transmission in London: Case management and contact tracing investigation  
947 assisted by early whole genome sequencing. *J Infect.* 2016;  
948 doi:10.1016/j.jinf.2016.04.037
- 949 3. Dheda K, Limberis JD, Pietersen E, Phelan J, Esmail A, Lesosky M, et al. Outcomes,  
950 infectiousness, and transmission dynamics of patients with extensively drug-resistant  
951 tuberculosis and home-discharged patients with programmatically incurable  
952 tuberculosis: a prospective cohort study. *Lancet Respir Med.* 2017; doi:10.1016/S2213-  
953 2600(16)30433-7
- 954 4. Fletcher HA, Schrag L. TB vaccine development and the End TB Strategy:  
955 importance and current status. *Trans R Soc Trop Med Hyg.* 2016;110: 212–218.  
956 doi:10.1093/trstmh/trw016
- 957 5. Behr M., Small P. A historical and molecular phylogeny of BCG strains. *Vaccine.*  
958 1999;17: 915–922. doi:10.1016/S0264-410X(98)00277-1
- 959 6. Brosch R, Gordon S V., Garnier T, Eiglmeier K, Frigui W, Valenti P, et al. Genome  
960 plasticity of BCG and impact on vaccine efficacy. *Proc Natl Acad Sci U S A.*  
961 2007;104: 5596–601. doi:10.1073/pnas.0700869104
- 962 7. Calmette A. Preventive Vaccination Against Tuberculosis with BCG. *Proc R Soc Med.*  
963 1931;24: 1481–90. Available: <http://www.ncbi.nlm.nih.gov/pubmed/19988326>
- 964 8. Kaufmann SH. Fact and fiction in tuberculosis vaccine research: 10 years later. *Lancet*  
965 *Infect Dis.* 2011;11: 633–640. doi:10.1016/S1473-3099(11)70146-3
- 966 9. Dockrell HM, Smith SG. What Have We Learnt about BCG Vaccination in the Last  
967 20 Years? *Front Immunol. Frontiers;* 2017;8: 1134. doi:10.3389/fimmu.2017.01134
- 968 10. Abdallah AM, Hill-Cawthorne GA, Otto TD, Coll F, Guerra-Assunção JA, Gao G, et  
969 al. Genomic expression catalogue of a global collection of BCG vaccine strains show

- 970 evidence for highly diverged metabolic and cell-wall adaptations. *Sci Rep. Nature*  
971 Publishing Group; 2015;5: 15443. doi:10.1038/srep15443
- 972 11. Tran V, Behr MA, Liu J. BCG Vaccines. *Molecular Genetics of Mycobacteria, Second*  
973 *Edition. American Society of Microbiology; 2014. pp. 49–59.*  
974 doi:10.1128/microbiolspec.MGM2-0028-2013
- 975 12. van der Woude AD, Luirink J, Bitter W. Getting Across the Cell Envelope:  
976 Mycobacterial Protein Secretion. *Current topics in microbiology and immunology.*  
977 2012. pp. 109–134. doi:10.1007/82\_2012\_298
- 978 13. Perkowski EF, Zulauf KE, Weerakoon D, Hayden JD, Ioerger TR, Oreper D, et al. The  
979 EXIT Strategy: an Approach for Identifying Bacterial Proteins Exported during Host  
980 Infection. *MBio. American Society for Microbiology; 2017;8: e00333-17.*  
981 doi:10.1128/mBio.00333-17
- 982 14. Gröschel MI, Sayes F, Simeone R, Majlessi L, Brosch R. ESX secretion systems:  
983 mycobacterial evolution to counter host immunity. *Nat Rev Microbiol.* 2016;14: 677–  
984 691. doi:10.1038/nrmicro.2016.131
- 985 15. Mahairas GG, Sabo PJ, Hickey MJ, Singh DC, Stover CK. Molecular analysis of  
986 genetic differences between *Mycobacterium bovis* BCG and virulent *M. bovis*. *J*  
987 *Bacteriol.* 1996;178: 1274–82. Available:  
988 [http://www.pubmedcentral.nih.gov/articlerender.fcgi?artid=177799&tool=pmcentrez&](http://www.pubmedcentral.nih.gov/articlerender.fcgi?artid=177799&tool=pmcentrez&rendertype=abstract)  
989 [rendertype=abstract](http://www.pubmedcentral.nih.gov/articlerender.fcgi?artid=177799&tool=pmcentrez&rendertype=abstract)
- 990 16. Pym AS, Brodin P, Brosch R, Huerre M, Cole ST. Loss of RD1 contributed to the  
991 attenuation of the live tuberculosis vaccines *Mycobacterium bovis* BCG and  
992 *Mycobacterium microti*. *Mol Microbiol.* 2002;46: 709–17. Available:  
993 <http://www.ncbi.nlm.nih.gov/pubmed/12410828>
- 994 17. Hsu T, Hingley-Wilson SM, Chen B, Chen M, Dai AZ, Morin PM, et al. The primary  
995 mechanism of attenuation of bacillus Calmette-Guerin is a loss of secreted lytic  
996 function required for invasion of lung interstitial tissue. *Proc Natl Acad Sci U S A.*  
997 2003;100: 12420–5. doi:10.1073/pnas.1635213100
- 998 18. van der Wel N, Hava D, Houben D, Fluitsma D, van Zon M, Pierson J, et al. M.

- 999 tuberculosis and *M. leprae* translocate from the phagolysosome to the cytosol in  
1000 myeloid cells. *Cell*. 2007;129: 1287–98. doi:10.1016/j.cell.2007.05.059
- 1001 19. Houben D, Demangel C, van Ingen J, Perez J, Baldeón L, Abdallah AM, et al. ESX-1-  
1002 mediated translocation to the cytosol controls virulence of mycobacteria. *Cell*  
1003 *Microbiol*. 2012;14: 1287–98. doi:10.1111/j.1462-5822.2012.01799.x
- 1004 20. Simeone R, Bobard A, Lippmann J, Bitter W, Majlessi L, Brosch R, et al. Phagosomal  
1005 rupture by *Mycobacterium tuberculosis* results in toxicity and host cell death. Ehrst S,  
1006 editor. *PLoS Pathog*. Public Library of Science; 2012;8: e1002507.  
1007 doi:10.1371/journal.ppat.1002507
- 1008 21. Simeone R, Sayes F, Song O, Gröschel MI, Brodin P, Brosch R, et al. Cytosolic Access  
1009 of *Mycobacterium tuberculosis*: Critical Impact of Phagosomal Acidification Control  
1010 and Demonstration of Occurrence In Vivo. *PLoS Pathog*. 2015;11: e1004650.  
1011 doi:10.1371/journal.ppat.1004650
- 1012 22. Pym AS, Brodin P, Majlessi L, Brosch R, Demangel C, Williams A, et al.  
1013 Recombinant BCG exporting ESAT-6 confers enhanced protection against  
1014 tuberculosis. *Nat Med*. 2003;9: 533–9. doi:10.1038/nm859
- 1015 23. Gröschel MI, Sayes F, Shin SJ, Frigui W, Pawlik A, Orgeur M, et al. Recombinant  
1016 BCG Expressing ESX-1 of *Mycobacterium marinum* Combines Low Virulence with  
1017 Cytosolic Immune Signaling and Improved TB Protection. *Cell Rep*. 2017;18: 2752–  
1018 2765. doi:10.1016/j.celrep.2017.02.057
- 1019 24. Aguilo N, Gonzalo-Asensio J, Alvarez-Arguedas S, Marinova D, Gomez AB, Uranga  
1020 S, et al. Reactogenicity to major tuberculosis antigens absent in BCG is linked to  
1021 improved protection against *Mycobacterium tuberculosis*. *Nat Commun*. 2017;8:  
1022 16085. doi:10.1038/ncomms16085
- 1023 25. Abdallah AM, Verboom T, Weerdenburg EM, Gey van Pittius NC, Mahasha PW,  
1024 Jiménez C, et al. PPE and PE\_PGRS proteins of *Mycobacterium marinum* are  
1025 transported via the type VII secretion system ESX-5. *Mol Microbiol*. 2009;73: 329–40.  
1026 doi:10.1111/j.1365-2958.2009.06783.x
- 1027 26. Ates LS, Ummels R, Commandeur S, van der Weerd R, Sparrius M, Weerdenburg E, et



- 1028 al. Essential Role of the ESX-5 Secretion System in Outer Membrane Permeability of  
1029 Pathogenic Mycobacteria. Viollier PH, editor. PLOS Genet. 2015;11: e1005190.  
1030 doi:10.1371/journal.pgen.1005190
- 1031 27. Gey van Pittius NC, Sampson SL, Lee H, Kim Y, van Helden PD, Warren RM.  
1032 Evolution and expansion of the Mycobacterium tuberculosis PE and PPE multigene  
1033 families and their association with the duplication of the ESAT-6 (esx) gene cluster  
1034 regions. BMC Evol Biol. 2006;6: 95. doi:10.1186/1471-2148-6-95
- 1035 28. Di Luca M, Bottai D, Batoni G, Orgeur M, Aulicino A, Counoupas C, et al. The ESX-5  
1036 associated eccB-EccC locus is essential for Mycobacterium tuberculosis viability.  
1037 PLoS One. 2012;7: e52059. doi:10.1371/journal.pone.0052059
- 1038 29. Cole ST, Brosch R, Parkhill J, Garnier T, Churcher C, Harris D, et al. Deciphering the  
1039 biology of Mycobacterium tuberculosis from the complete genome sequence. Nature.  
1040 1998;393: 537–44. doi:10.1038/31159
- 1041 30. Deb C, Daniel J, Sirakova TD, Abomoelak B, Dubey VS, Kolattukudy PE. A novel  
1042 lipase belonging to the hormone-sensitive lipase family induced under starvation to  
1043 utilize stored triacylglycerol in Mycobacterium tuberculosis. J Biol Chem. 2006;281:  
1044 3866–75. doi:10.1074/jbc.M505556200
- 1045 31. Daleke MH, Cascioferro A, de Punder K, Ummels R, Abdallah AM, van der Wel N, et  
1046 al. Conserved Pro-Glu (PE) and Pro-Pro-Glu (PPE) protein domains target LipY  
1047 lipases of pathogenic mycobacteria to the cell surface via the ESX-5 pathway. J Biol  
1048 Chem. 2011;286: 19024–34. doi:10.1074/jbc.M110.204966
- 1049 32. Ates LS, van der Woude AD, Bestebroer J, van Stempvoort G, Musters RJP, Garcia-  
1050 Vallejo JJ, et al. The ESX-5 System of Pathogenic Mycobacteria Is Involved In  
1051 Capsule Integrity and Virulence through Its Substrate PPE10. PLoS Pathog. 2016;12.  
1052 doi:10.1371/journal.ppat.1005696
- 1053 33. Sampson SL. Mycobacterial PE/PPE proteins at the host-pathogen interface. Clin Dev  
1054 Immunol. 2011;2011: 497203. doi:10.1155/2011/497203
- 1055 34. Ates LS, Houben ENG, Bitter W. Type VII Secretion: A Highly Versatile Secretion  
1056 System. Virulence Mechanisms of Bacterial Pathogens, Fifth Edition. American

- 1057 Society of Microbiology; 2016. pp. 357–384. doi:10.1128/microbiolspec.VMBF-0011-  
1058 2015
- 1059 35. Saini NK, Baena A, Ng TW, Venkataswamy MM, Kennedy SC, Kunnath-Velayudhan  
1060 S, et al. Suppression of autophagy and antigen presentation by Mycobacterium  
1061 tuberculosis PE\_PGRS47. *Nat Microbiol.* 2016;1: 16133.  
1062 doi:10.1038/nmicrobiol.2016.133
- 1063 36. Brennan MJ, Delogu G. The PE multigene family: a “molecular mantra” for  
1064 mycobacteria. *Trends Microbiol.* 2002;10: 246–249. doi:10.1016/S0966-  
1065 842X(02)02335-1
- 1066 37. Ates LS, Dippenaar A, Ummels R, Piersma SR, van der Woude AD, van der Kuij K, et  
1067 al. Mutations in ppe38 block PE\_PGRS secretion and increase virulence of  
1068 Mycobacterium tuberculosis. *Nat Microbiol.* 2018;3: 181–188. doi:10.1038/s41564-  
1069 017-0090-6
- 1070 38. McEvoy CRE, van Helden PD, Warren RM, Gey van Pittius NC. Evidence for a rapid  
1071 rate of molecular evolution at the hypervariable and immunogenic Mycobacterium  
1072 tuberculosis PPE38 gene region. *BMC Evol Biol.* 2009;9: 237. doi:10.1186/1471-  
1073 2148-9-237
- 1074 39. Gordon S V, Brosch R, Billault A, Garnier T, Eiglmeier K, Cole ST. Identification of  
1075 variable regions in the genomes of tubercle bacilli using bacterial artificial  
1076 chromosome arrays. *Mol Microbiol.* 1999;32: 643–55. Available:  
1077 <http://www.ncbi.nlm.nih.gov/pubmed/10320585>
- 1078 40. Raynaud C, Guilhot C, Rauzier J, Bordat Y, Pelicic V, Manganelli R, et al.  
1079 Phospholipases C are involved in the virulence of Mycobacterium tuberculosis. *Mol*  
1080 *Microbiol.* 2002;45: 203–17. Available:  
1081 <http://www.ncbi.nlm.nih.gov/pubmed/12100560>
- 1082 41. Smith, D. A., Parish, T., Smith, S. M., Dockrell, H. M., Stoker, N. G. & Bancroft GJ.  
1083 Deletion of mycobacterial phospholipases C and haemolysin alters virulence and  
1084 inhibits T cell recognition of Mycobacterium tuberculosis H37Rv. *Fifth Int Conf*  
1085 *Pathog Mycobact Infect Stock Sweden, Abstr book.* 2002; 11.

- 1086 42. Le Chevalier F, Cascioferro A, Frigui W, Pawlik A, Boritsch EC, Bottai D, et al.  
1087 Revisiting the role of phospholipases C in virulence and the lifecycle of  
1088 *Mycobacterium tuberculosis*. *Sci Rep*. 2015;5: 16918. doi:10.1038/srep16918
- 1089 43. Supply P, Marceau M, Mangenot S, Roche D, Rouanet C, Khanna V, et al. Genomic  
1090 analysis of smooth tubercle bacilli provides insights into ancestry and pathoadaptation  
1091 of *Mycobacterium tuberculosis*. *Nat Genet*. 2013;45: 172–9. doi:10.1038/ng.2517
- 1092 44. Boritsch EC, Frigui W, Cascioferro A, Malaga W, Etienne G, Laval F, et al. pks5-  
1093 recombination-mediated surface remodelling in *Mycobacterium tuberculosis*  
1094 emergence. *Nat Microbiol*. 2016;1: 15019. doi:10.1038/nmicrobiol.2015.19
- 1095 45. Boritsch EC, Khanna V, Pawlik A, Honoré N, Navas VH, Ma L, et al. Key  
1096 experimental evidence of chromosomal DNA transfer among selected tuberculosis-  
1097 causing mycobacteria. *Proc Natl Acad Sci*. 2016;113: 9876–9881.  
1098 doi:10.1073/pnas.1604921113
- 1099 46. Lee RS, Radomski N, Proulx J-F, Levade I, Shapiro BJ, McIntosh F, et al. Population  
1100 genomics of *Mycobacterium tuberculosis* in the Inuit. *Proc Natl Acad Sci*. 2015;2000:  
1101 201507071. doi:10.1073/pnas.1507071112
- 1102 47. Brosch R, Gordon S V., Marmiesse M, Brodin P, Buchrieser C, Eiglmeier K, et al. A  
1103 new evolutionary scenario for the *Mycobacterium tuberculosis* complex. *Proc Natl*  
1104 *Acad Sci*. *BioMed Central*; 2002;99: 3684–3689. doi:10.1073/pnas.052548299
- 1105 48. Coscolla M, Lewin A, Metzger S, Maetz-Rennsing K, Calvignac-Spencer S, Nitsche A,  
1106 et al. Novel *Mycobacterium tuberculosis* complex isolate from a wild chimpanzee.  
1107 *Emerg Infect Dis*. 2013;19: 969–76. doi:10.3201/eid1906.121012
- 1108 49. Zhu L, Zhong J, Jia X, Liu G, Kang Y, Dong M, et al. Precision methylome  
1109 characterization of *Mycobacterium tuberculosis* complex (MTBC) using PacBio single-  
1110 molecule real-time (SMRT) technology. *Nucleic Acids Res*. John Wiley & Sons, Inc.;  
1111 2016;44: 730–743. doi:10.1093/nar/gkv1498
- 1112 50. Mostowy S, Inwald J, Gordon S, Martin C, Warren R, Kremer K, et al. Revisiting the  
1113 evolution of *Mycobacterium bovis*. *J Bacteriol*. American Society for Microbiology  
1114 (ASM); 2005;187: 6386–95. doi:10.1128/JB.187.18.6386-6395.2005

- 1115 51. van Ingen J, Rahim Z, Mulder A, Boeree MJ, Simeone R, Brosch R, et al.  
1116 Characterization of *Mycobacterium orygis* as *M. tuberculosis* complex subspecies.  
1117 *Emerg Infect Dis.* 2012;18: 653–5. doi:10.3201/eid1804.110888
- 1118 52. Sayes F, Sun L, Di Luca M, Simeone R, Degaiffier N, Fiette L, et al. Strong  
1119 immunogenicity and cross-reactivity of *Mycobacterium tuberculosis* ESX-5 type VII  
1120 secretion: encoded PE-PPE proteins predicts vaccine potential. *Cell Host Microbe.*  
1121 2012;11: 352–63. doi:10.1016/j.chom.2012.03.003
- 1122 53. Frigui W, Bottai D, Majlessi L, Monot M, Josselin E, Brodin P, et al. Control of *M.*  
1123 *tuberculosis* ESAT-6 secretion and specific T cell recognition by PhoP. *PLoS Pathog.*  
1124 2008;4: e33. doi:10.1371/journal.ppat.0040033
- 1125 54. Majlessi L, Brodin P, Brosch R, Rojas M-J, Khun H, Huerre M, et al. Influence of  
1126 ESAT-6 secretion system 1 (RD1) of *Mycobacterium tuberculosis* on the interaction  
1127 between mycobacteria and the host immune system. *J Immunol.* 2005;174: 3570–9.  
1128 Available: <http://www.ncbi.nlm.nih.gov/pubmed/15749894>
- 1129 55. Brodin P, Majlessi L, Marsollier L, de Jonge MI, Bottai D, Demangel C, et al.  
1130 Dissection of ESAT-6 system 1 of *Mycobacterium tuberculosis* and impact on  
1131 immunogenicity and virulence. *Infect Immun.* 2006;74: 88–98.  
1132 doi:10.1128/IAI.74.1.88-98.2006
- 1133 56. Meng L, Tong J, Wang H, Tao C, Wang Q, Niu C, et al. PPE38 Protein of  
1134 *Mycobacterium tuberculosis* Inhibits Macrophage MHC Class I Expression and  
1135 Dampens CD8+ T Cell Responses. *Front Cell Infect Microbiol. Frontiers;* 2017;7: 68.  
1136 doi:10.3389/fcimb.2017.00068
- 1137 57. Houben ENG, Bestebroer J, Ummels R, Wilson L, Piersma SR, Jiménez CR, et al.  
1138 Composition of the type VII secretion system membrane complex. *Mol Microbiol.*  
1139 2012;86: 472–84. doi:10.1111/j.1365-2958.2012.08206.x
- 1140 58. Prados-Rosales R, Carreno LJ, Weinrick B, Batista-Gonzalez A, Xu J, Chan J, et al.  
1141 The presence of a mycobacterial capsule is associated with differences in the protective  
1142 efficacy of BCG vaccination against *Mycobacterium tuberculosis* in mice. *J Infect Dis.*  
1143 2016; jiw153-. doi:10.1093/infdis/jiw153

- 1144 59. Lindestam Arlehamn CS, Gerasimova A, Mele F, Henderson R, Swann J, Greenbaum  
1145 JA, et al. Memory T Cells in Latent Mycobacterium tuberculosis Infection Are  
1146 Directed against Three Antigenic Islands and Largely Contained in a CXCR3+CCR6+  
1147 Th1 Subset. Salgame P, editor. PLoS Pathog. 2013;9: e1003130.  
1148 doi:10.1371/journal.ppat.1003130
- 1149 60. Bertholet S, Ireton GC, Ordway DJ, Windish HP, Pine SO, Kahn M, et al. A Defined  
1150 Tuberculosis Vaccine Candidate Boosts BCG and Protects Against Multidrug-Resistant  
1151 Mycobacterium tuberculosis. Sci Transl Med. 2010;2. Available:  
1152 <http://stm.sciencemag.org/content/2/53/53ra74/tab-pdf>
- 1153 61. Baldwin SL, Reese VA, Huang PD, Beebe EA, Podell BK, Reed SG, et al. Protection  
1154 and long-lived immunity induced by the ID93/GLA-SE vaccine candidate against a  
1155 clinical Mycobacterium tuberculosis isolate. Clin Vaccine Immunol. 2015; CVI.00458-  
1156 15. doi:10.1128/CVI.00458-15
- 1157 62. Brennan MJ. The enigmatic PE/PPE Multi-gene Family of Mycobacteria and TB  
1158 Vaccination. Infect Immun. 2017; IAI.00969-16. doi:10.1128/IAI.00969-16
- 1159 63. Sayes F, Pawlik A, Frigui W, Gröschel MI, Crommelynck S, Fayolle C, et al. CD4+ T  
1160 Cells Recognizing PE/PPE Antigens Directly or via Cross Reactivity Are Protective  
1161 against Pulmonary Mycobacterium tuberculosis Infection. Lewinson DM, editor.  
1162 PLOS Pathog. 2016;12: e1005770. doi:10.1371/journal.ppat.1005770
- 1163 64. McEvoy CRE, Cloete R, Müller B, Schürch AC, Helden PD van, Gagneux S, et al.  
1164 Comparative Analysis of Mycobacterium tuberculosis pe and ppe Genes Reveals High  
1165 Sequence Variation and an Apparent Absence of Selective Constraints. PLoS One.  
1166 Public Library of Science; 2012;7: e30593. doi:10.1371/JOURNAL.PONE.0030593
- 1167 65. Copin R, Coscollá M, Seiffert SN, Bothamley G, Sutherland J, Mbayo G, et al.  
1168 Sequence diversity in the pe\_pgrs genes of Mycobacterium tuberculosis is independent  
1169 of human T cell recognition. MBio. American Society for Microbiology; 2014;5:  
1170 e00960-13. doi:10.1128/mBio.00960-13
- 1171 66. Bertholet S, Ireton GC, Kahn M, Guderian J, Mohamath R, Stride N, et al.  
1172 Identification of Human T Cell Antigens for the Development of Vaccines against  
1173 Mycobacterium tuberculosis. J Immunol. 2008;181. Available:

- 1174 <http://www.jimmunol.org/content/181/11/7948>
- 1175 67. Kim A, Hur Y-G, Gu S, Cho S-N. Protective vaccine efficacy of the complete form of  
1176 PPE39 protein from *Mycobacterium tuberculosis* Beijing/K strain in mice. *Clin*  
1177 *Vaccine Immunol.* American Society for Microbiology; 2017; CVI.00219-17.  
1178 doi:10.1128/CVI.00219-17
- 1179 68. Kruh NA, Trout J, Izzo A, Prenni J, Dobos KM. Portrait of a pathogen: the  
1180 *Mycobacterium tuberculosis* proteome in vivo. *PLoS One.* 2010;5: e13938.  
1181 doi:10.1371/journal.pone.0013938
- 1182 69. Kapopoulou A, Lew JM, Cole ST. The MycoBrowser portal: a comprehensive and  
1183 manually annotated resource for mycobacterial genomes. *Tuberculosis (Edinb).*  
1184 2011;91: 8–13. doi:10.1016/j.tube.2010.09.006
- 1185 70. Bardarov S, Kriakov J, Carriere C, Yu S, Vaamonde C, McAdam RA, et al.  
1186 Conditionally replicating mycobacteriophages: a system for transposon delivery to  
1187 *Mycobacterium tuberculosis*. *Proc Natl Acad Sci U S A.* 1997;94: 10961–6. Available:  
1188 [http://www.pubmedcentral.nih.gov/articlerender.fcgi?artid=23545&tool=pmcentrez&re](http://www.pubmedcentral.nih.gov/articlerender.fcgi?artid=23545&tool=pmcentrez&rendertype=abstract)  
1189 [ndertype=abstract](http://www.pubmedcentral.nih.gov/articlerender.fcgi?artid=23545&tool=pmcentrez&rendertype=abstract)
- 1190 71. Bottai D, Di Luca M, Majlessi L, Frigui W, Simeone R, Sayes F, et al. Disruption of  
1191 the ESX-5 system of *Mycobacterium tuberculosis* causes loss of PPE protein secretion,  
1192 reduction of cell wall integrity and strong attenuation. *Mol Microbiol.* 2012;83: 1195–  
1193 209. doi:10.1111/j.1365-2958.2012.08001.x
- 1194 72. Beckham KSH, Ciccarelli L, Bunduc CM, Mertens HDT, Ummels R, Lugmayr W, et  
1195 al. Structure of the mycobacterial ESX-5 type VII secretion system membrane complex  
1196 by single particle analysis. *Nat Microbiol.* 2017;2: 1–8.  
1197 doi:10.1038/nmicrobiol.2017.47
- 1198 73. Brandt L, Oettinger T, Holm A, Andersen AB, Andersen P. Key epitopes on the ESAT-  
1199 6 antigen recognized in mice during the recall of protective immunity to  
1200 *Mycobacterium tuberculosis*. *J Immunol.* 1996;157: 3527–33. Available:  
1201 <http://www.ncbi.nlm.nih.gov/pubmed/8871652>
- 1202 74. Wu Y, Woodworth JS, Shin DS, Morris S, Behar SM. Vaccine-elicited 10-kilodalton

- 1203 culture filtrate protein-specific CD8+ T cells are sufficient to mediate protection  
1204 against *Mycobacterium tuberculosis* infection. *Infect Immun.* 2008;76: 2249–55.  
1205 doi:10.1128/IAI.00024-08
- 1206 75. Marrichi M, Camacho L, Russell DG, DeLisa MP. Genetic toggling of alkaline  
1207 phosphatase folding reveals signal peptides for all major modes of transport across the  
1208 inner membrane of bacteria. *J Biol Chem.* 2008;283: 35223–35.  
1209 doi:10.1074/jbc.M802660200
- 1210 76. D’Souza S, Rosseels V, Romano M, Tanghe A, Denis O, Jurion F, et al. Mapping of  
1211 murine Th1 helper T-Cell epitopes of mycolyl transferases Ag85A, Ag85B, and Ag85C  
1212 from *Mycobacterium tuberculosis*. *Infect Immun. American Society for Microbiology;*  
1213 2003;71: 483–93. doi:10.1128/IAI.71.1.483-493.2003
- 1214 77. Kato-Maeda M, Rhee JT, Gingeras TR, Salamon H, Drenkow J, Smittipat N, et al.  
1215 Comparing genomes within the species *Mycobacterium tuberculosis*. *Genome Res.*  
1216 2001;11: 547–54. doi:10.1101/gr166401
- 1217 78. Alland D, Whittam TS, Murray MB, Cave MD, Hazbon MH, Dix K, et al. Modeling  
1218 bacterial evolution with comparative-genome-based marker systems: application to  
1219 *Mycobacterium tuberculosis* evolution and pathogenesis. *J Bacteriol.* 2003;185: 3392–  
1220 9. Available: <http://www.ncbi.nlm.nih.gov/pubmed/12754238>
- 1221 79. Brodin P, Eiglmeier K, Marmiesse M, Billault A, Garnier T, Niemann S, et al.  
1222 Bacterial Artificial Chromosome-Based Comparative Genomic Analysis Identifies  
1223 *Mycobacterium microti* as a Natural ESAT-6 Deletion Mutant. *Infect Immun.* 2002;70:  
1224 5568–5578. doi:10.1128/IAI.70.10.5568-5578.2002
- 1225 80. Mostowy S, Cousins D, Behr MA. Genomic interrogation of the dassie bacillus reveals  
1226 it as a unique RD1 mutant within the *Mycobacterium tuberculosis* complex. *J*  
1227 *Bacteriol.* 2004;186: 104–9. Available:  
1228 <http://www.ncbi.nlm.nih.gov/pubmed/14679230>
- 1229 81. Dippenaar A, Parsons SDC, Sampson SL, van der Merwe RG, Drewe JA, Abdallah  
1230 AM, et al. Whole genome sequence analysis of *Mycobacterium suricattae*.  
1231 *Tuberculosis (Edinb).* 2015;95: 682–8. doi:10.1016/j.tube.2015.10.001

- 1232 82. Merker M, Blin C, Mona S, Duforet-Frebourg N, Lecher S, Willery E, et al.  
1233 Evolutionary history and global spread of the Mycobacterium tuberculosis Beijing  
1234 lineage. *Nat Genet.* 2015;47: 242–9. doi:10.1038/ng.3195
- 1235 83. Brites D, Gagneux S. Co-evolution of Mycobacterium tuberculosis and Homo sapiens.  
1236 *Immunol Rev.* Wiley-Blackwell; 2015;264: 6–24. doi:10.1111/imr.12264
- 1237 84. Bansal K, Elluru SR, Narayana Y, Chaturvedi R, Patil SA, Kaveri S V., et al.  
1238 PE\_PGRS Antigens of Mycobacterium tuberculosis Induce Maturation and Activation  
1239 of Human Dendritic Cells. *J Immunol.* 2010;184: 3495–3504.  
1240 doi:10.4049/jimmunol.0903299
- 1241 85. Deng W, Long Q, Zeng J, Li P, Yang W, Chen X, et al. Mycobacterium tuberculosis  
1242 PE\_PGRS41 Enhances the Intracellular Survival of M. smegmatis within Macrophages  
1243 Via Blocking Innate Immunity and Inhibition of Host Defense. *Sci Rep.* 2017;7:  
1244 46716. doi:10.1038/srep46716
- 1245 86. Chatrath S, Gupta VK, Dixit A, Garg LC. PE\_PGRS30 of Mycobacterium tuberculosis  
1246 mediates suppression of proinflammatory immune response in macrophages through its  
1247 PGRS and PE domains. *Microbes Infect.* 2016;18: 536–42.  
1248 doi:10.1016/j.micinf.2016.04.004
- 1249 87. Zumbo A, Palucci I, Cascioferro A, Sali M, Ventura M, D'Alfonso P, et al. Functional  
1250 dissection of protein domains involved in the immunomodulatory properties of  
1251 PE\_PGRS33 of *Mycobacterium tuberculosis*. *Pathog Dis.* 2013;69: 232–239.  
1252 doi:10.1111/2049-632X.12096
- 1253 88. Ramakrishnan L, Federspiel NA, Falkow S. Granuloma-specific expression of  
1254 Mycobacterium virulence proteins from the glycine-rich PE-PGRS family. *Science.*  
1255 2000;288: 1436–9. Available: <http://www.ncbi.nlm.nih.gov/pubmed/10827956>
- 1256 89. Fishbein S, Wyk N, Warren RM, Sampson SL. Phylogeny to function: PE/PPE protein  
1257 evolution and impact on Mycobacterium tuberculosis pathogenicity. *Mol Microbiol.*  
1258 2015;96: 901–916. doi:10.1111/MMI.12981
- 1259 90. Malone KM, Gordon S V. Mycobacterium tuberculosis Complex Members Adapted to  
1260 Wild and Domestic Animals. *Advances in experimental medicine and biology.* 2017.



- 1261 pp. 135–154. doi:10.1007/978-3-319-64371-7\_7
- 1262 91. Delogu G, Brennan MJ. Comparative immune response to PE and PE\_PGRS antigens  
1263 of *Mycobacterium tuberculosis*. *Infect Immun*. 2001;69: 5606–11. Available:  
1264 [http://www.pubmedcentral.nih.gov/articlerender.fcgi?artid=98675&tool=pmcentrez&re](http://www.pubmedcentral.nih.gov/articlerender.fcgi?artid=98675&tool=pmcentrez&rendertype=abstract)  
1265 [ndertype=abstract](http://www.pubmedcentral.nih.gov/articlerender.fcgi?artid=98675&tool=pmcentrez&rendertype=abstract)
- 1266 92. Koh KW, Soh SE, Seah GT. Strong antibody responses to *Mycobacterium tuberculosis*  
1267 PE-PGRS62 protein are associated with latent and active tuberculosis. *Infect Immun*.  
1268 2009;77: 3337–43. doi:10.1128/IAI.01175-08
- 1269 93. Phase 1 ID93 + GLA-SE Vaccine Trial in Healthy Adult Volunteers - Full Text View -  
1270 ClinicalTrials.gov [Internet]. [cited 21 Sep 2017]. Available:  
1271 <https://clinicaltrials.gov/ct2/show/NCT01599897>
- 1272 94. Phase 2a ID93 + GLA-SE Vaccine Trial in TB Patients After Treatment Completion -  
1273 Full Text View - ClinicalTrials.gov [Internet]. [cited 21 Sep 2017]. Available:  
1274 <https://clinicaltrials.gov/ct2/show/NCT02465216>
- 1275 95. Arbues A, Aguilo JI, Gonzalo-Asensio J, Marinova D, Uranga S, Puentes E, et al.  
1276 Construction, characterization and preclinical evaluation of MTBVAC, the first live-  
1277 attenuated *M. tuberculosis*-based vaccine to enter clinical trials. *Vaccine*. 2013;31:  
1278 4867–73. doi:10.1016/j.vaccine.2013.07.051
- 1279 96. Johnson M, Zaretskaya I, Raytselis Y, Merezhuk Y, McGinnis S, Madden TL. NCBI  
1280 BLAST: a better web interface. *Nucleic Acids Res*. 2008;36: W5–W9.  
1281 doi:10.1093/nar/gkn201
- 1282 97. Garnier T, Eiglmeier K, Camus J-CJ-C, Medina N, Mansoor H, Pryor M, et al. The  
1283 complete genome sequence of *Mycobacterium bovis*. *Proc Natl Acad Sci U S A*.  
1284 2003;100: 7877–82. doi:10.1073/pnas.1130426100
- 1285 98. Keating LA, Wheeler PR, Mansoor H, Inwald JK, Dale J, Hewinson RG, et al. The  
1286 pyruvate requirement of some members of the *Mycobacterium tuberculosis* complex is  
1287 due to an inactive pyruvate kinase: implications for in vivo growth. *Mol Microbiol*.  
1288 2005;56: 163–174. doi:10.1111/j.1365-2958.2005.04524.x

- 1289 99. Bange F-C, Collins FM, Jacobs WR. Survival of mice infected with Mycobacterium  
1290 smegmatis containing large DNA fragments from Mycobacterium tuberculosis. *Tuber*  
1291 *Lung Dis.* 1999;79: 171–180. doi:10.1054/tuld.1998.0201
- 1292 100. Alderson MR, Bement T, Day CH, Zhu L, Molesh D, Skeiky YA, et al. Expression  
1293 cloning of an immunodominant family of Mycobacterium tuberculosis antigens using  
1294 human CD4(+) T cells. *J Exp Med.* 2000;191: 551–60. Available:  
1295 <http://www.ncbi.nlm.nih.gov/pubmed/10662800>
- 1296 101. Abdallah AM, Verboom T, Hannes F, Safi M, Strong M, Eisenberg D, et al. A specific  
1297 secretion system mediates PPE41 transport in pathogenic mycobacteria. *Mol*  
1298 *Microbiol.* 2006;62: 667–79. doi:10.1111/j.1365-2958.2006.05409.x
- 1299

**A**

primers:

**Strain:***M. tuberculosis*  
H37Rv/CDC1551

Lee et al. Mj-sublineage

 $\Delta ppe38-71$ Complementation vector  
pMV::*ppe38-71**M. bovis* & *M. caprae**M. bovis* BCG*M. orygis**M. pinnipedii*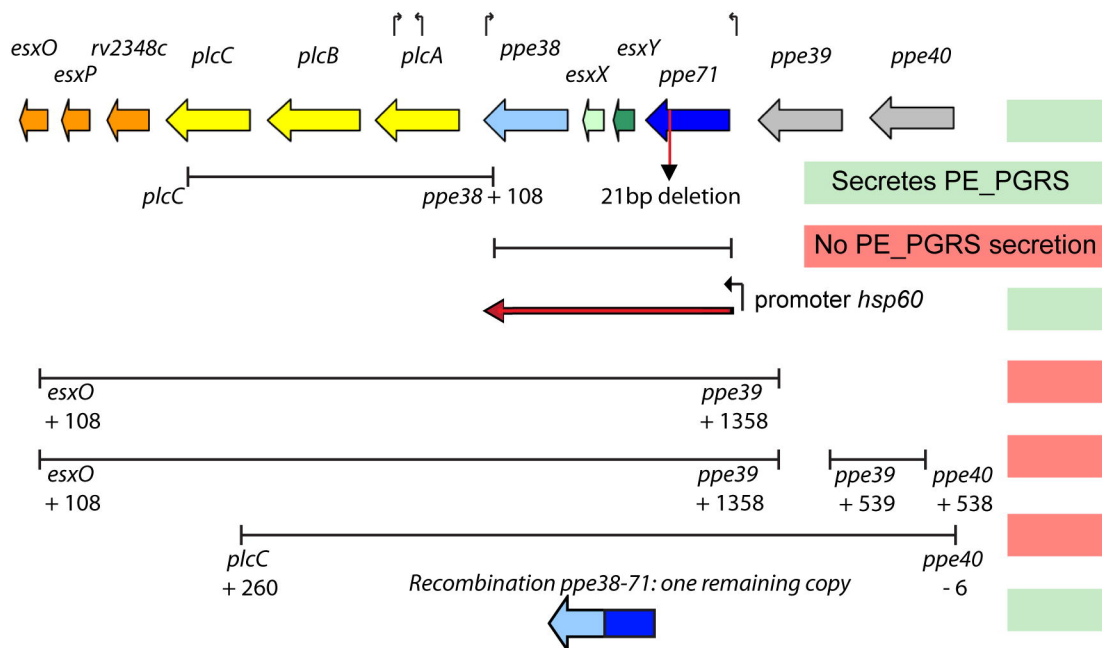**B**Whole-cell  
lysateCulture  
filtrate**Strain:****Mw  
(kDa)**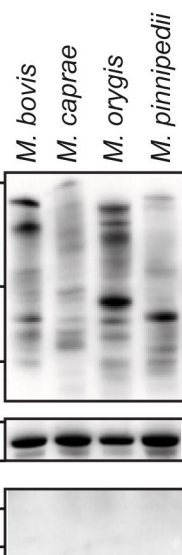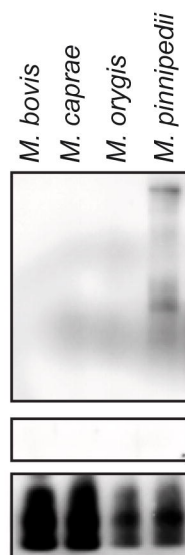**C**Whole-cell  
LysateCulture  
Filtrate**Strain:****Mw  
(kDa)**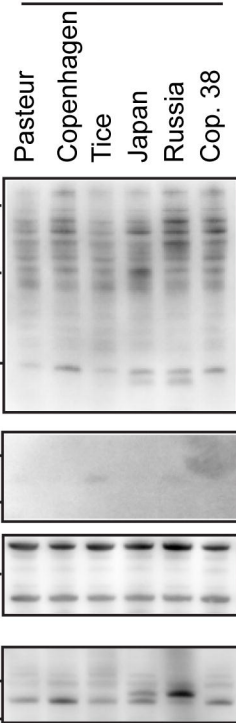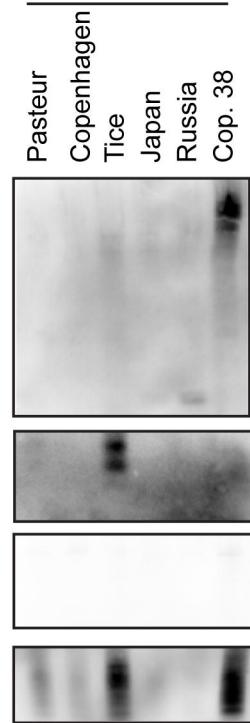**PGRS****EsxN****SigA****PPE41**

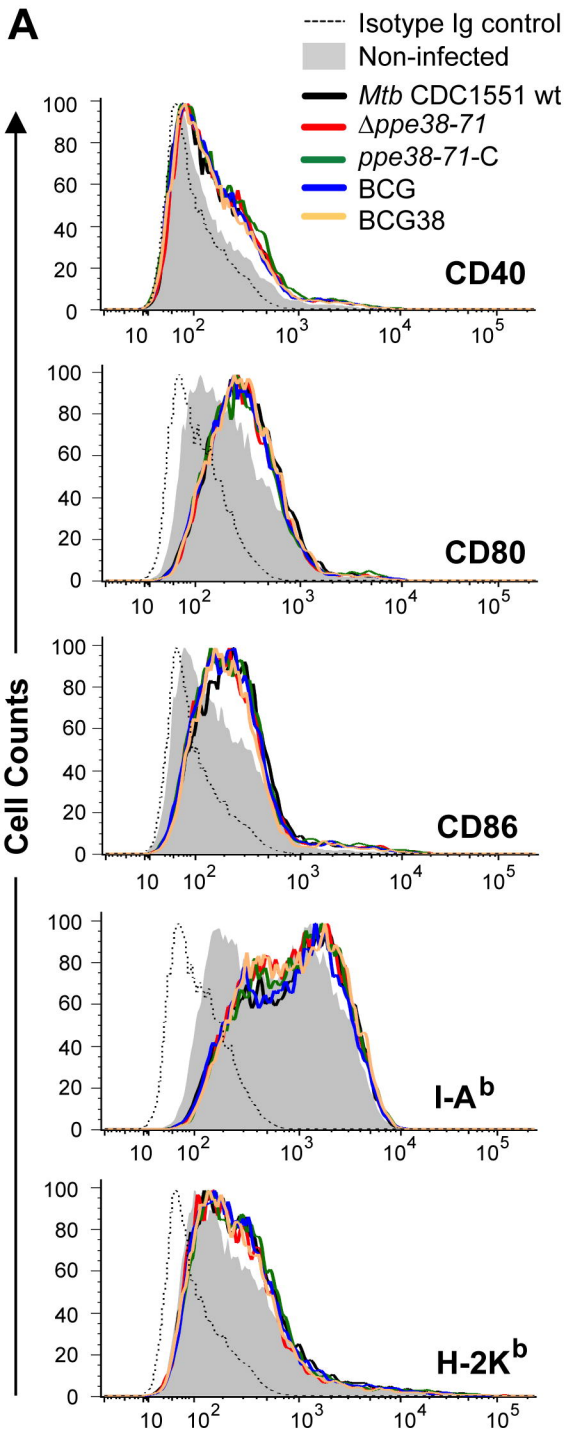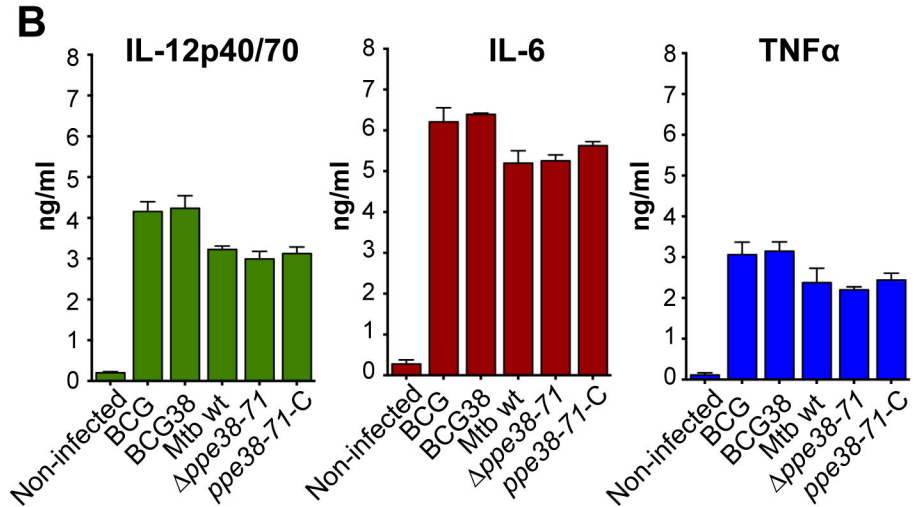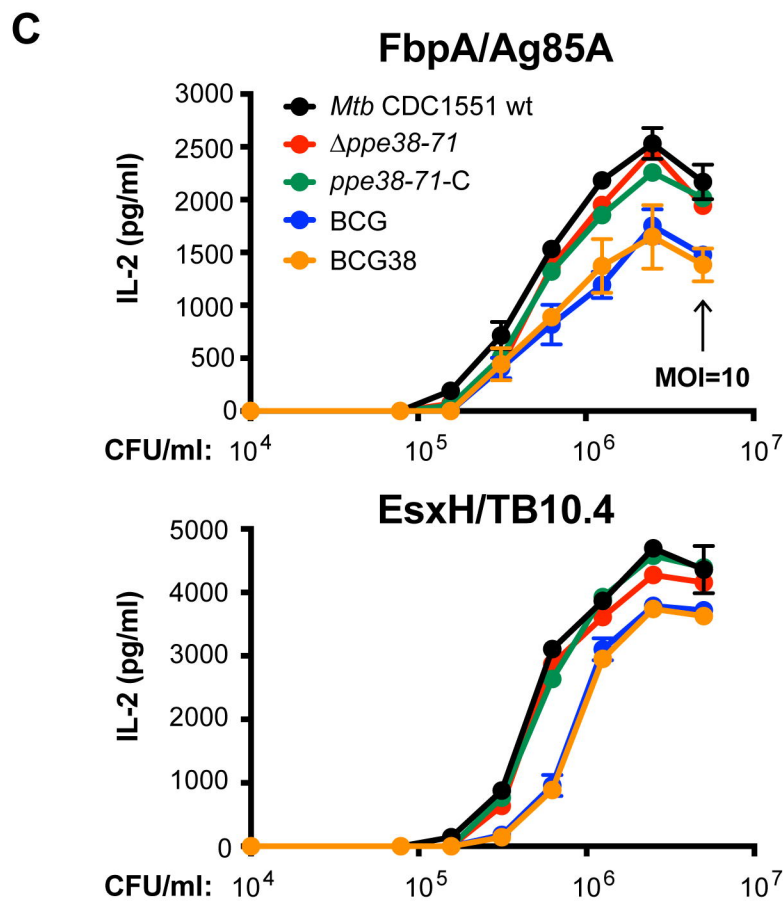

**A**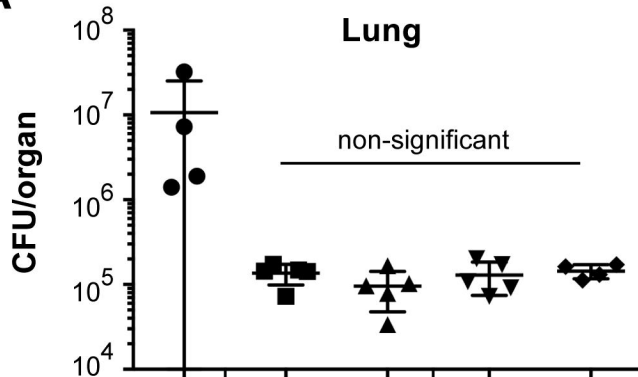

|                            |      |     |   |       |   |
|----------------------------|------|-----|---|-------|---|
| <b>Vaccine:</b>            | -    | BCG |   | BCG38 |   |
| <b>Capsule (-Tween-80)</b> | N.A. | -   | + | -     | + |

**B**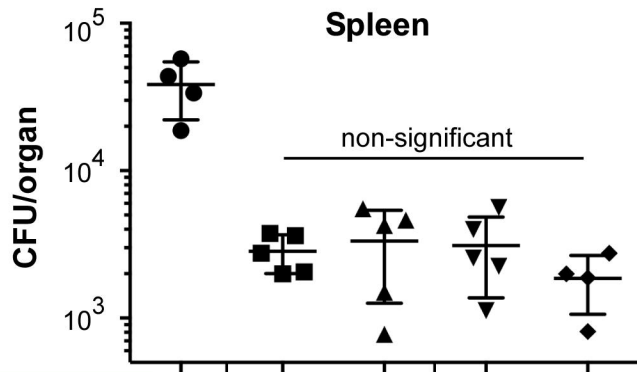

|                            |      |     |   |       |   |
|----------------------------|------|-----|---|-------|---|
| <b>Vaccine:</b>            | -    | BCG |   | BCG38 |   |
| <b>Capsule (-Tween-80)</b> | N.A. | -   | + | -     | + |

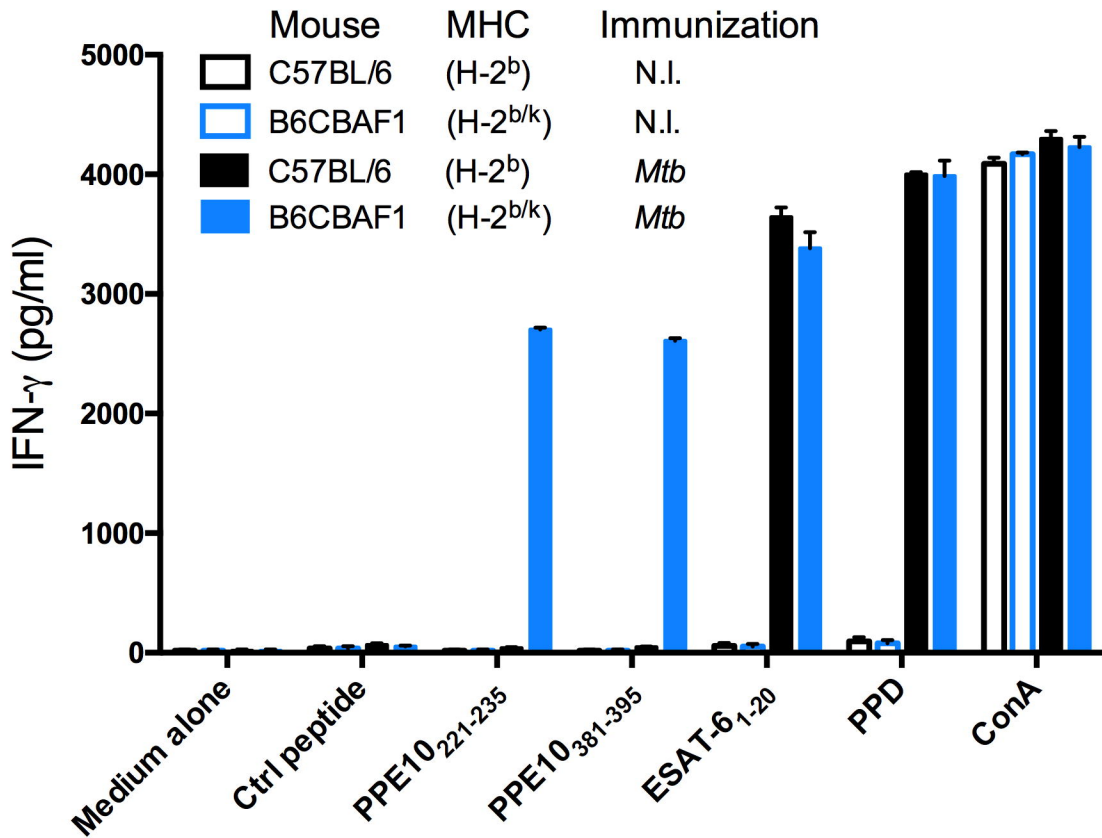

**CDC 1551 WT****CDC 1551  $\Delta ppe10$** **Unimmunized**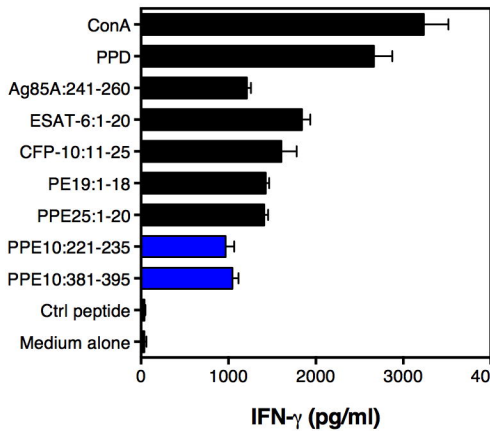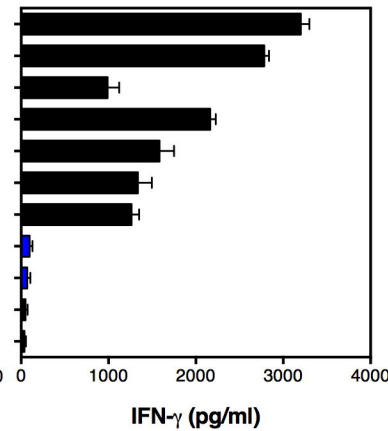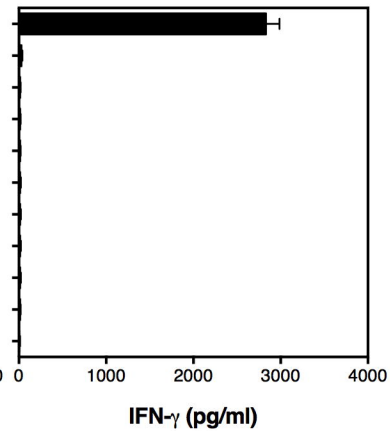**CDC 1551  $\Delta ppe38-71$** **CDC 1551  $\Delta ppe38-71$ -C****CDC 1551  $eccC_5::tn$** 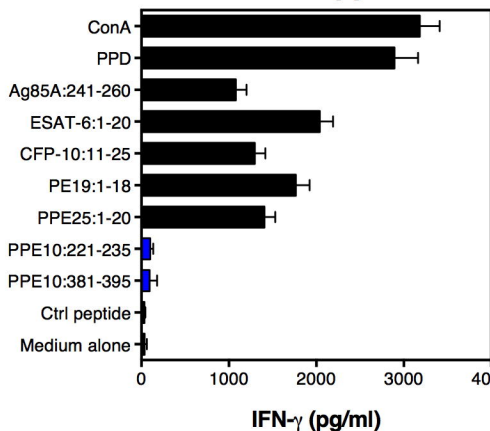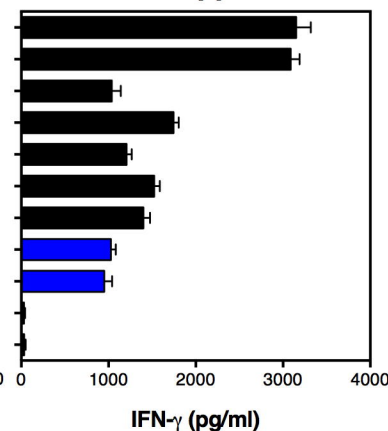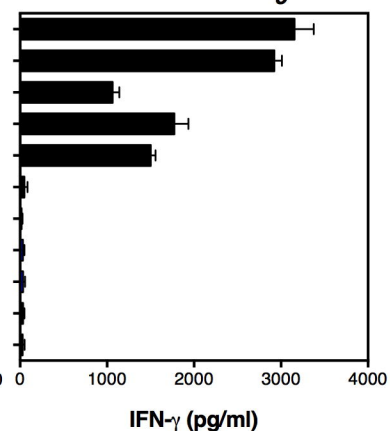**BCG WT****BCG38****H37Rv  $\Delta ppe25-pe19$** 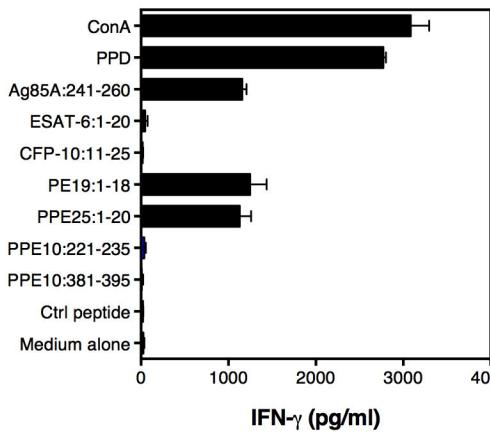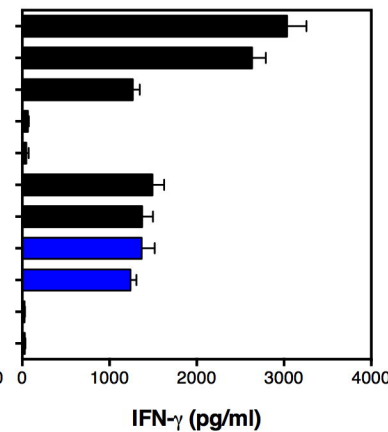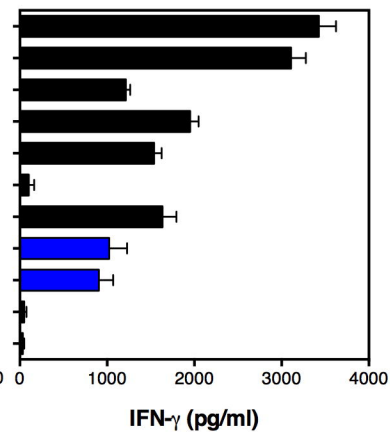

**A**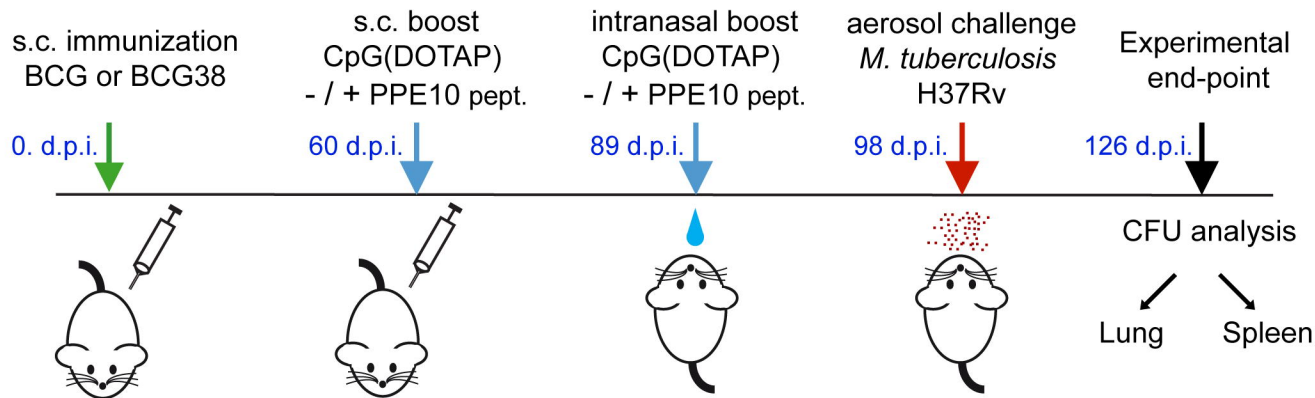**B**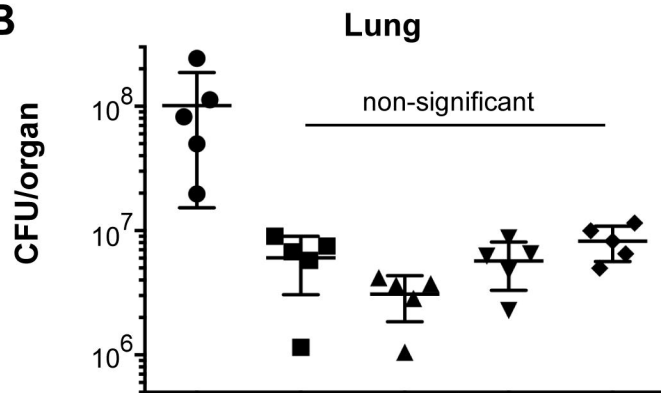**C**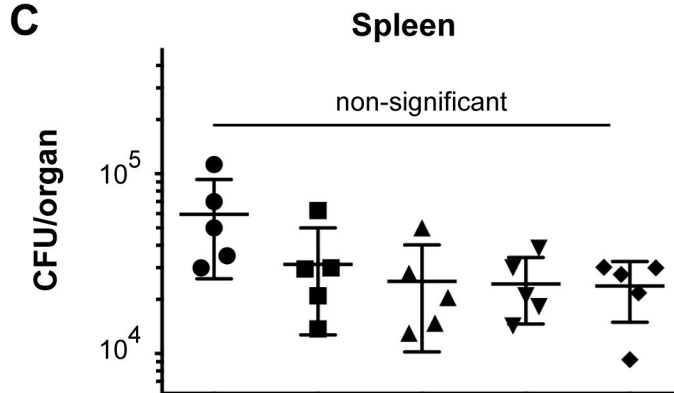

| Vaccine:     | - | BCG |   | BCG38 |   |
|--------------|---|-----|---|-------|---|
| CpG(DOTAP):  | - | +   | + | +     | + |
| PPE10 pept.: | - | -   | + | -     | + |

| Vaccine:     | - | BCG |   | BCG38 |   |
|--------------|---|-----|---|-------|---|
| CpG(DOTAP):  | - | +   | + | +     | + |
| PPE10 pept.: | - | -   | + | -     | + |
